1 **Identification of parallel pH- and zeaxanthin-dependent quenching of excess energy**  
2 **in LHCSR3 in *Chlamydomonas reinhardtii***

3 Julianne M. Troiano<sup>1,\*</sup>, Federico Perozen<sup>2,\*</sup>, Raymundo Moya<sup>1</sup>, Luca Zuliani<sup>2</sup>,  
4 Kwangryul Baek<sup>3</sup>, EonSeon Jin<sup>3</sup>, Stefano Cazzaniga<sup>2</sup>, Matteo Ballottari<sup>2,#</sup>, Gabriela S.  
5 Schlau-Cohen<sup>1,#</sup>

6 <sup>1</sup>Department of Chemistry, Massachusetts Institute of Technology, Cambridge MA  
7 02139 USA

8 <sup>2</sup>Department of Biotechnology, University of Verona, 37134 Verona, Italy

9 <sup>3</sup>Department of Life Science, Hanyang University, Seoul, Korea.

10 \*J.M.T. and F.P. contributed equally to this work

11 #to whom correspondence should be addressed.

12 **Email:** [matteo.ballottari@univr.it](mailto:matteo.ballottari@univr.it) (M.B.), [gssc@mit.edu](mailto:gssc@mit.edu) (G.S.S.-C.)

## 13 **Abstract**

14 Under high light conditions, oxygenic photosynthetic organisms avoid photodamage by  
15 thermally dissipating excess absorbed energy, which is called non-photochemical  
16 quenching (NPQ). In green algae, a chlorophyll and carotenoid-binding protein, light-  
17 harvesting complex stress-related (LHCSR3), detects excess energy via pH and serves as  
18 a quenching site. However, the mechanisms by which LHCSR3 functions have not been  
19 determined. Using a combined in vivo and in vitro approach, we identify two parallel yet  
20 distinct quenching processes, individually controlled by pH and carotenoid composition,  
21 and their likely molecular origin within LHCSR3 from *Chlamydomonas reinhardtii*. The  
22 pH-controlled quenching is removed within a mutant LHCSR3 that lacks the protonable  
23 residues responsible for sensing pH. Constitutive quenching in zeaxanthin-enriched  
24 systems demonstrates zeaxanthin-controlled quenching, which may be shared with other  
25 light-harvesting complexes. We show that both quenching processes prevent the  
26 formation of damaging reactive oxygen species, and thus provide distinct timescales and  
27 mechanisms of protection in a changing environment.

28

## 29 **Introduction**

30 Sunlight is the essential source of energy for most photosynthetic organisms, yet sunlight  
31 in excess of the organism's photosynthetic capacity can generate reactive oxygen species  
32 (ROS) that lead to cellular damage. To avoid damage, plants respond to high light by  
33 activating photophysical pathways that safely convert excess energy to heat, which is  
34 known as nonphotochemical quenching (NPQ) (Rochaix 2014). While NPQ allows for  
35 healthy growth, it also limits the overall photosynthetic efficiency under many  
36 conditions. If NPQ were optimized for biomass, yields would improve dramatically,  
37 potentially by up to 30% (Kromdijk et al. 2016, Zhu et al. 2010). However, critical  
38 information to guide optimization is still lacking, including the molecular origin of NPQ  
39 and the mechanism of regulation.

40

41 Green algae is a sustainable alternative for biofuels and livestock feed (Lum et al. 2013,  
42 Wijffels et al. 2010). In *Chlamydomonas (C.) reinhardtii*, the model organism for green

43 algae, light-harvesting complex stress-related (LHCSR) is the key gene product for NPQ.  
44 LHCSR contains chlorophyll (Chl) and carotenoid (Car) held within its protein scaffold.  
45 Two isoforms of LHCSR, LHCSR1 and LHCSR3, are active in NPQ, although LHCSR3  
46 is accumulated at higher levels and so has the major role (Dinc et al. 2016, Maruyama et  
47 al. 2014, Peers et al. 2009, Tokutsu et al. 2013). While the photophysical mechanism of  
48 quenching in light-harvesting complexes has not been determined, the primary proposals  
49 involve Chl-Car interactions (Liao et al. 2010, Ma et al. 2003, Ruban et al. 2007, Son,  
50 Pinnola, Gordon, et al. 2020, Son, Pinnola, and Schlau-Cohen 2020, de la Cruz Valbuena  
51 et al. 2019).

52

53 NPQ is triggered by a proton gradient across the thylakoid membrane that forms through  
54 a drop in luminal pH under excess light. The C-terminus of LHCSR3 contains a number  
55 of protonable residues exposed to the lumen that act as a pH sensor to trigger quenching  
56 (Ballottari et al. 2016, Liguori et al. 2013). The pH drop also activates the enzymatic  
57 conversion of the Car violaxanthin (Vio) to zeaxanthin (Zea) (Eskling et al. 1997). Along  
58 with LHCSR, other homologous light-harvesting complexes are likely involved in  
59 quenching (Nicol et al. 2019). In *C. reinhardtii*, the CP26 and CP29 subunits, which are  
60 minor antenna complexes of Photosystem II (PSII), have been implicated in NPQ  
61 (Cazzaniga et al. 2020). In higher plants, Zea has been reported to be involved in NPQ  
62 induction by driving light-harvesting complexes into a quenched state and/or by  
63 mediating interaction between light-harvesting complexes and PsbS, non-pigment  
64 binding subunits essential for NPQ induction in vascular plants (Sacharz et al. 2017, Ahn  
65 et al. 2008, Jahns et al. 2012). Similarly, Zea binding to LHCSR1 in the moss  
66 *Physcomitrella patens* and LHCX1 (a LHCSR homolog) in the microalga  
67 *Nannochloropsis oceanica* has been shown to be essential for NPQ (Pinnola et al. 2013,  
68 Park et al. 2019). Finally, in *C. reinhardtii*, a reduction of NPQ in the absence of Zea has  
69 been reported (Niyogi et al. 1997). In contrast, recent work has shown Zea to be  
70 unnecessary for NPQ induction or related to highly specific growth conditions (Bonente  
71 et al. 2011, Tian et al. 2019, Vidal-Meireles et al. 2020). Thus, the contribution of Zea to  
72 quenching in green algae remains under debate.

73

74 Because of the complexity of NPQ and the large number of homologous light-harvesting  
75 complexes, the individual contributions and mechanisms associated with LHCSR3, pH,  
76 and Zea have been challenging to disentangle, including whether they activate quenching  
77 separately or collectively. With the power of mutagenesis, the contribution of LHCSR3,  
78 and the dependence of this contribution on pH and Zea, can be determined. However, in  
79 vivo experiments leave the molecular mechanisms of LHCSR3 and its activation  
80 obscured. In vitro experiments, and particularly single-molecule fluorescence  
81 spectroscopy, are a powerful complement to identify protein conformational states  
82 (Gwizdala et al. 2016, Krüger et al. 2010, Kondo et al. 2017, Schlau-Cohen et al. 2014,  
83 Schlau-Cohen et al. 2015). A recent method to analyze single-molecule data, 2D  
84 fluorescence correlation analysis (2D-FLC) (Ishii et al. 2013a, Kondo et al. 2019),  
85 quantifies the number of conformational states and their dynamics, including  
86 simultaneous, independent processes. Thus, the conformational states associated with  
87 NPQ can be resolved.

88

89 Here, we apply a combined in vivo and in vitro approach to investigate NPQ in *C.*  
90 *reinhardtii*. We use mutagenesis, NPQ induction experiments, and fluorescence lifetime  
91 measurements on whole cells and single LHCSR3 complexes to show that pH and Zea  
92 function in parallel and can independently activate full quenching and prevent ROS  
93 accumulation. The pH-dependent quenching is controlled by protonable residues in the  
94 C-terminus of LHCSR3 as shown by mutagenesis to remove these residues. The Zea-  
95 dependent quenching is constitutive both in vitro and in vivo, reconciling previous  
96 conflicting reports. Based on the collective results, we find two likely quenching sites, *i.e.*  
97 Chl-Car pairs within LHCSR3, one regulated by pH and the other by Zea. The existence  
98 of two quenching processes provide different time scales of activation and deactivation of  
99 photoprotection, allowing survival under variable light conditions.

100

## 101 Results

102 **Roles of pH and Zea in fluorescence intensity in vivo and in vitro.** To disentangle the  
103 contributions of LHCSR, pH, and Zea, both in vivo and in vitro measurements were  
104 performed on different *C. reinhardtii* genotypes. Wild type (WT) strains (4A+ and  
105 CC4349), a strain depleted of LHCSR3 and LHCSR1 subunits (*npq4 lhcsr1*; Figure 1—  
106 figure supplement 1 and 2)(Ballottari et al. 2016), a strain unable to accumulate Zea due  
107 to knock out of the enzyme responsible for xanthophyll cycle activation (*npq1*; Figure 1—  
108 –figure supplement 3) (Li et al. 2016) and a mutant constitutively accumulating Zea due  
109 to knock out of the zeaxanthin epoxidase enzyme (*zep*; Figure 1—figure supplement 3)  
110 (Baek et al. 2016, Niyogi et al. 1997) were characterized in vivo. A mutant depleted of  
111 both LHCSR subunits (*npq4 lhcsr1*) was chosen rather than a mutant missing only  
112 LHCSR3 (*npq4*) due to the partial ability of LHCSR1 to substitute for LHCSR3 in its  
113 absence (Girolomoni et al. 2019).

114

115 To assess the ability of these phenotypes to undergo quenching of Chl fluorescence, the  
116 NPQ levels were measured in vivo after cells were acclimated to high light (HL, 500  
117  $\mu\text{mol m}^{-2}\text{s}^{-1}$ ) for several generations to induce LHCSR expression (WT, *npq1*, and *zep*  
118 strains) and then exposed to strong light treatment (1500  $\mu\text{mol m}^{-2}\text{s}^{-1}$ ) for 60 minutes to  
119 induce maximum drop in luminal pH and Zea accumulation (WT, *np1*, *zep*, and *npq4*  
120 *lhcsr1* strains; data for xanthophyll cycle activation shown in Figure 1—figure  
121 supplement 3). The NPQ induction kinetics are shown in Figure 1. In the WT strains, the  
122 maximum NPQ level was reached after 10 minutes of illumination and fully recovered in  
123 the dark (Figure 1A, black), despite a strong accumulation of Zea (Figure 1—figure  
124 supplement 3). In the *npq4 lhcsr1* strain, which lacks LHCSR subunits, a null NPQ  
125 phenotype was observed (Figure 1A, purple). These results confirm that LHCSR subunits  
126 are responsible for NPQ in *C. reinhardtii*.

127

128 In the *npq1* strain, which lacks Zea, no reduction of the maximum level of NPQ was  
129 observed compared to its background, the 4A+ WT strain (Figure 1A, blue, black). The  
130 similar level and timescales of onset and recovery for NPQ suggest a minor role, if any,

131 for Zea in light-activated quenching. In the *zep* strain, which constitutively accumulates  
132 Zea, a strong reduction of the NPQ level was observed compared to both WT strains  
133 CC4349 and 4A+ (Figure 1A, red). To understand why, first accumulation of the LHCSR  
134 subunits was measured (Figure 1—figure supplements 1 and 2). However, similar  
135 LHCSR3 content was found in WT strains (4A+ and CC4349), *npq1* and *zep* mutants. In  
136 the case of LHCSR1, similar accumulation was observed in 4A+ and *zep* mutant, while  
137 no trace of this subunit was detectable in the WT strain CC4349. Second, the extent of  
138 proton motive force as compared to WT was measured through the electrochromic shift  
139 (Bailleul et al. 2010). However, although proton transport into the lumen was reduced in  
140 the *zep* strain at low actinic light, it was similar at the higher irradiance used for  
141 measurement of NPQ (Figure 1—figure supplement 4). Therefore, neither differences in  
142 LHCSR accumulation nor in proton transport are the cause of the reduced NPQ  
143 phenotype in the *zep* mutant.

144

145 In order to investigate the effect of pH and Zea at the level of the LHCSR3 subunit,  
146 single-molecule fluorescence was measured for individual complexes (representative  
147 intensity traces in Figure 1—figure supplement 6). Histograms were constructed of the  
148 intensity levels for LHCSR3 with Vio at high and low pH, which mimic the cellular  
149 environment under low and high light conditions, respectively. The fluorescence intensity  
150 decreases, generally along with the fluorescence lifetime, as quenching increases. As an  
151 initial straightforward comparison, we present the fluorescence intensity from single  
152 LHCSR3. The fluorescence lifetime exhibits complex kinetics (de la Cruz Valbuena et al.  
153 2019), and so we analyze the associated lifetime data with a recently-developed model-  
154 free method, 2D fluorescence lifetime correlation (2D-FLC), as discussed in detail below.  
155 As shown in Figure 1B, upon a decrease in pH from 7.5 to 5.0, the average fluorescence  
156 intensity of LHCSR3-Vio decreases as the quenched population increases, representing  
157 an increase in quenching of the excitation energy absorbed. This is consistent with the  
158 conclusion from the in vivo NPQ experiments that quenching can occur without Zea  
159 under high light conditions.

160 Activation of LHCSR3 as a quencher has been suggested previously to be related to  
161 protonation of putative pH-sensing residues present at the C-terminus (Figure 1—figure  
162 supplement 7). To assess the role of these protonable residues in pH-dependent  
163 quenching, a mutant of LHCSR3 lacking this protein portion (stop-LHCSR3) was  
164 measured in vitro (Figure 1—figure supplements 8 and 9). Upon the same pH decrease  
165 that induced quenching in LHCSR3-Vio, stop-LHCSR3-Vio exhibits similar fluorescence  
166 intensity (Figure 1C). The data show that the mutants have lost the ability to activate  
167 quenching channels upon a pH drop, highlighting the sensing role of the protonable  
168 residues of the C-terminus of LHCSR3.

169

170

171

172

173

174

175

176

177

178

179

180

181

182

183

184

185

186

187

188

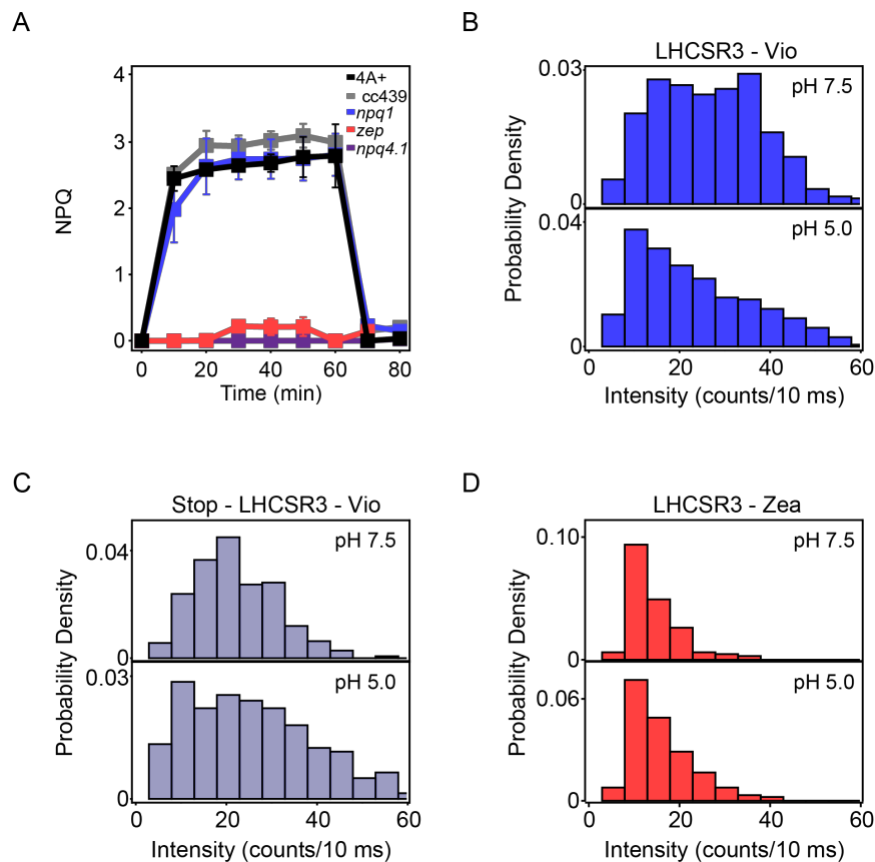

**Figure 1. Experimental studies of quenching mechanisms in vivo and in vitro.** (A) NPQ induction kinetics for high-light acclimated samples measured upon 60 minutes of high light ( $1500 \mu\text{mol m}^{-2}\text{s}^{-1}$ ) in vivo. The results are reported as the mean of three independent biological replicates ( $N=3$ ). Error bars are reported as standard deviation. Kinetics for low-light acclimated samples are shown in Figure 1 – figure supplement 5. Histograms of fluorescence intensities from single-molecule measurements on (B) LHCSR3-Vio, (C) stop-LHCSR3-Vio, and (D) LHCSR3-Zea at pH 7.5 (top) and pH 5.0 (bottom).

189 Single-molecule measurements were also performed on LHCSR3 with Zea at high and  
190 low pH. Under both conditions, as shown in Figure 1D, LHCSR3 with Zea in vitro show  
191 decreased fluorescence intensity due to increased quenching. The pH-independence of  
192 these histograms is consistent with the NPQ measurements in the *zep* mutants where high  
193 light, and the associated pH drop in the lumen, does not change quenching levels.  
194 However, these measurements point to the existence of a constitutive quenching process  
195 in the presence of Zea, consistent with in vivo fluorescence lifetime measurements  
196 discussed below.

197 **Roles of pH and Zea in fluorescence lifetime in vitro.** To further assess and quantify  
198 the contributions of pH and Zea in quenching in LHCSR3 in vitro, we used 2D-FLC to  
199 analyze the fluorescence lifetime data from single LHCSR3 complexes (Kondo et al.  
200 2019). The 2D-FLC analysis identifies fluorescence lifetime states, which correspond to  
201 protein conformations with different extents of quenching, and quantifies the transition  
202 rates between the lifetime states, which correspond to switches between the protein  
203 conformations. The analysis also identifies the number of dynamic components that  
204 switch between the states, which correspond to independent processes occurring  
205 simultaneously yet separately within single LHCSR3.

206

207 The number of lifetime states was determined through the lifetime distribution (Figure 2  
208 —figure supplement 1 and 2). The distribution was constructed by performing an inverse  
209 Laplace transform of the lifetime data (time between excitation and emission), which was  
210 recorded on a photon-by-photon basis. Unlike traditional lifetime fitting, the distribution  
211 is a model-free analysis of the decay components, which is particularly important when  
212 there are multiple and varied components as is the case for LHCSR3 (de la Cruz  
213 Valbuena et al. 2019). This allows analysis of multi-component lifetimes, even for the  
214 low signal-to-background regime of single-molecule data. For each of the LHCSR3  
215 samples, two lifetime states were observed, an active state (~2.5 ns) and a quenched state  
216 (~0.5 ns).

217



218 The number of parallel conformational processes occurring within single LHCSR3 was  
219 found by quantifying the number of dynamical components through a global fit of the  
220 auto- and cross-correlations for each sample. The best fits to the data were accomplished  
221 by including three dynamical components at different timescales (Figure 2—figure  
222 supplement 3, Figure 2 – table supplement 1). Two of these components, one on a tens of  
223 microsecond timescale and the other on a hundreds of microsecond timescale, would be  
224 hidden in traditional single-molecule analyses. The cross-correlation for every LHCSR3  
225 sample begins above zero (Figure 2—figure supplement 3), which appears when the  
226 dynamic components occur in parallel (Kondo et al. 2019). The Chl *a* have the lowest  
227 energy levels, which are the emissive states that give rise to each component. The  
228 existence of three components indicates multiple Chl *a* emissive sites within LHCSR3,  
229 consistent with previous models of LHCs (Mascoli et al. 2019, Mascoli et al. 2020,  
230 Krüger et al. 2010, Krüger et al. 2011). The two dynamic components arise from changes  
231 in the extent of quenching of the Chl emitters. The third component is static at  $<0.01$  s,  
232 which is attributed to unquenched emitters in the active state and partially photobleached  
233 complexes in the quenched state.

234

235 The parameters extracted from the global fit include the intensity of and population in  
236 each lifetime state. The rate constants for the transitions between the states are also  
237 determined, primarily from the cross-correlation functions. The parameters can be used to  
238 construct illustrative free energy landscapes, which are shown in Figure 2 for the two  
239 dynamic components. The depth of each free energy well depends on the population of  
240 the state and the barrier between wells depends on the rate constants (Kondo et al. 2019).  
241 The energies associated with each well are given in Figure 2—table supplement 1.

242

243 We examine the dependence on molecular parameters of the two dynamical components.  
244 Figure 2A and 2B show the pH-dependence of the free energy landscapes for the slower  
245 component in LHCSR3-Vio and LHCSR3-Zea, respectively. In both cases, a decrease in  
246 pH from 7.5 to 5.0 stabilizes the quenched state. In LHCSR3-Vio, the quenched state is  
247 stabilized by a decrease in the transition rate from the quenched to the active state,

248 corresponding to a higher barrier in the free energy landscape. In LHCSR3-Zea, the  
249 decrease in the transition rate from the quenched to the active state is also accompanied  
250 by an increase in the transition rate from the active to the quenched state, further  
251 stabilizing the quenched state relative to the unquenched one. In stop-LHCSR3-Vio,  
252 however, no change in the population of the quenched state is observed upon a decrease  
253 in pH (Figure 2C), reflecting the expected pH-independence of the sample.

254

255 Figure 2E and F show the Zea-dependence of the free energy landscapes of LHCSR3 for  
256 the faster dynamic component at pH 5.0 and pH 7.5. At both pH levels, conversion from  
257 Vio to Zea stabilizes the quenched state via a decrease in the transition rate from the  
258 quenched to active state. At pH 5.0, the transition rate to the quenched state increases as  
259 illustrated by the lower barrier, which would enable rapid equilibration of population into  
260 the quenched state. The Zea-dependent behavior is maintained for stop-LHCSR3 (Figure  
261 2G), where the quenched state is still stabilized in the presence of Zea.

262

263 The two dynamic components reveal two parallel yet independent photoprotective  
264 processes, one pH-dependent and one Zea-dependent, within LHCSR3, demonstrating  
265 multifunctionality of the protein structure. Each component likely arises from a Chl-Car  
266 pair, where the Car can quench the emissive Chl. The two components are both biased  
267 towards the quenched state in the LHCSR3 complexes, consistent with previous work  
268 where a quenching component was found to be active in LHCSR3, even at pH 7.5 (de la  
269 Cruz Valbuena et al. 2019). By considering the results of the 2D-FLC analysis along with  
270 previous structural, spectroscopic and theoretical work, we speculate as to the likely sites  
271 associated with each component. Although no high-resolution structure of LHCSR3 has  
272 been determined, we illustrate possible quenching sites (Figure 2D and H) within a  
273 working structural model of LHCSR3 (Bonente et al. 2011). As shown in Figure 2D and  
274 H (Figure 2—table supplement 2), LHCSR3 purified from *C. reinhardtii* contains eight  
275 Chl molecules (7-8 Chl *a* and 0-1 Chl *b* molecules) and two Cars (one lutein (Lut) and  
276 one Vio or Zea). Based on sequence comparison with LHCI and CP29, the conserved  
277 Chl *a* binding sites are the following: Chls *a* 602, 603, 609, 610, 612 and 613, with Chls

278 a604, 608 and 611 proposed as well (Bonente et al. 2011, Liguori et al. 2016). Previous  
279 spectroscopic analysis of LHCSR3 from *C. reinhardtii* has identified the likely binding  
280 sites of Lut and Vio/Zea within the structural model (Bonente et al. 2011). Given that  
281 there are two Cars bound at the internal sites of LHCSR3, it is likely that each Car and its  
282 neighboring Chl is the major contributor for one of the two dynamic components.

283

284

285

286

287

288

289

290

291

292

293

294

295

296

297

298

299

300

301

302

303

304

305

306

307

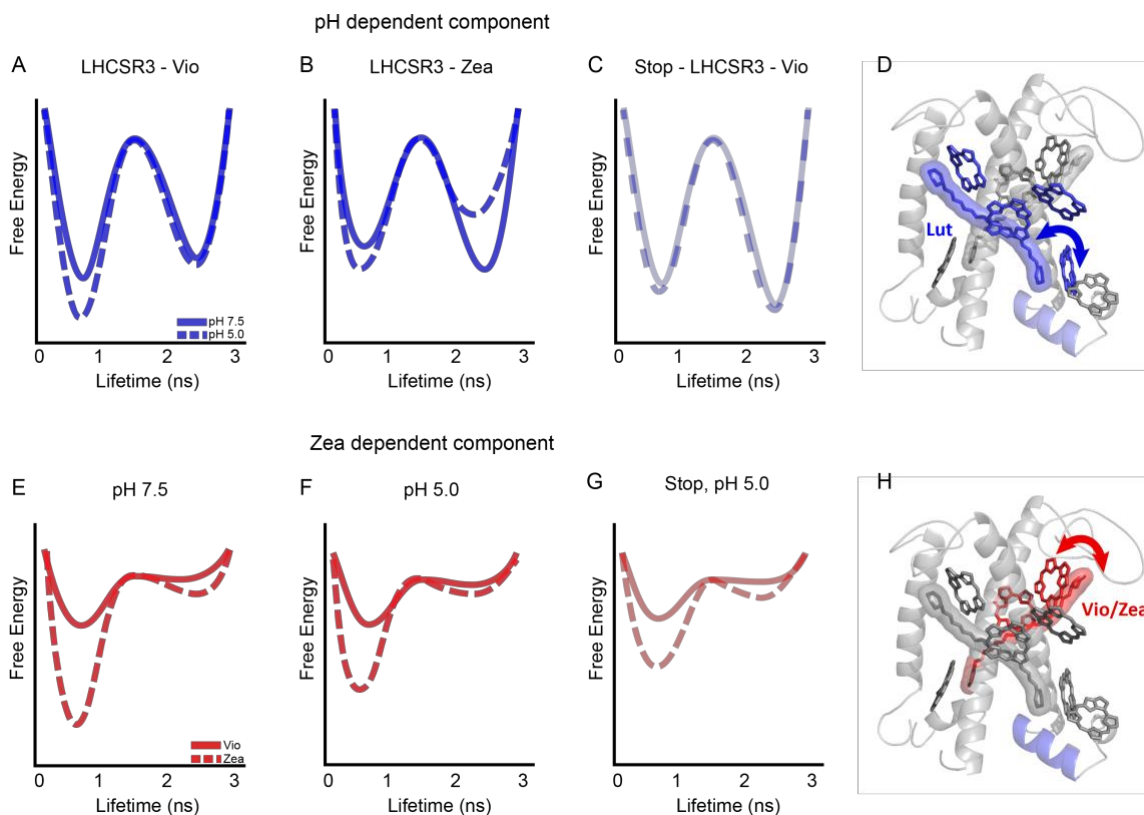

**Figure 2. pH- and Zea-dependent quenching in LHCSR3.** Free energy diagrams extracted from the 2D-FLC analysis (A-C and E-G) and structural model with likely quenching sites (D and H) for the effects of pH (top) and Zea (bottom) on protein dynamics.

302

303 The pH-dependent component (Figure 2, top, blue) likely involves Lut and its  
304 neighboring Chl. Both Chl *a* 612 (coupled to Chl *as* 610 and 611) and Chl *a* 613 have  
305 previously been proposed as quenching sites given their physical proximity to the Lut  
306 (Liguori et al. 2016, Ruban et al. 2007). The Chl *a* 610-612 site contains the lowest  
307 energy Chl *a*, which has been shown to be a major energy sink and thus the primary

308 emitter (Muh et al. 2010, Schlau-Cohen et al. 2009, Novoderezhkin et al. 2011).  
309 Additionally, computational results have shown that the interaction between the Lut site  
310 and Chl *a* 612 has large fluctuations (Liguori et al. 2015). This agrees with the slower  
311 dynamics found for this component. However, recent *in vivo* and *in vitro* analyses found  
312 that the removal of Chl *a* 613 results in a reduction in LHCSR specific quenching, while  
313 removal of Chl *a* 612 only affected which Chl was the final emitter of the complex  
314 (Perozeni et al. 2019). While either of these sites are potential quenching sites, it is likely  
315 that Chl *a* 613 plays the major role in pH-dependent quenching in LHCSR3 in *C.*  
316 *reinhardtii*.

317

318 With a decrease in pH from 7.5 to 5.0, the equilibrium free energy difference for the pH-  
319 dependent component is shifted toward the quenched state by over 200 cm<sup>-1</sup> in LHCSR3-  
320 Vio and over 500 cm<sup>-1</sup> in LHCSR3-Zea. The specific conformational change upon  
321 protonation that leads to this stabilization remains undetermined. However, proposals in  
322 the literature include reduced electrostatic repulsion in the lumen-exposed domain causes  
323 a change in the distance and/or orientation between the helices (Ballottari et al. 2016) and  
324 an increase in protein-protein interactions (de la Cruz Valbuena et al. 2019). These  
325 conformational changes could produce a displacement of Lut towards Chl *a* 613. The  
326 negligible (< 30 cm<sup>-1</sup>) change in the equilibrium free energy difference for stop-LHCSR3  
327 (Figure 2C, Figure 2—table supplement 1) demonstrates the functional role of the C-  
328 terminal tail in the conformational change.

329

330 The Zea-dependent component (Figure 2, bottom, red) likely involves Vio/Zea and the  
331 neighboring Chl *as* 602-603 (Bonente et al. 2011, Di Valentin et al. 2009, Lampoura et  
332 al. 2002). With conversion from Vio to Zea, the free energy landscape changes  
333 significantly, and thus is likely to involve Vio/Zea itself. In addition, MD simulations  
334 have shown this Car site to be highly flexible, sampling many configurations (Liguori et  
335 al. 2017), which is consistent with the faster dynamics observed here. Upon substitution  
336 of Zea for Vio, the equilibrium free energy difference becomes further quenched-biased  
337 by over 550 cm<sup>-1</sup> at pH 7.5 and over 300 cm<sup>-1</sup> at pH 5.0. This result is consistent with a

338 role of Zea in quenching of LHCSR3 that does not require a decrease in pH and therefore  
339 being unrelated to the light dependent NPQ observed in vivo in the WT that almost  
340 completely recovered in the dark (Figure 1A).

341

342

343

344

345

346

347

348

349

350

351

352

353

354

355

356

357

358

359

360

361

362

363

364

365

366

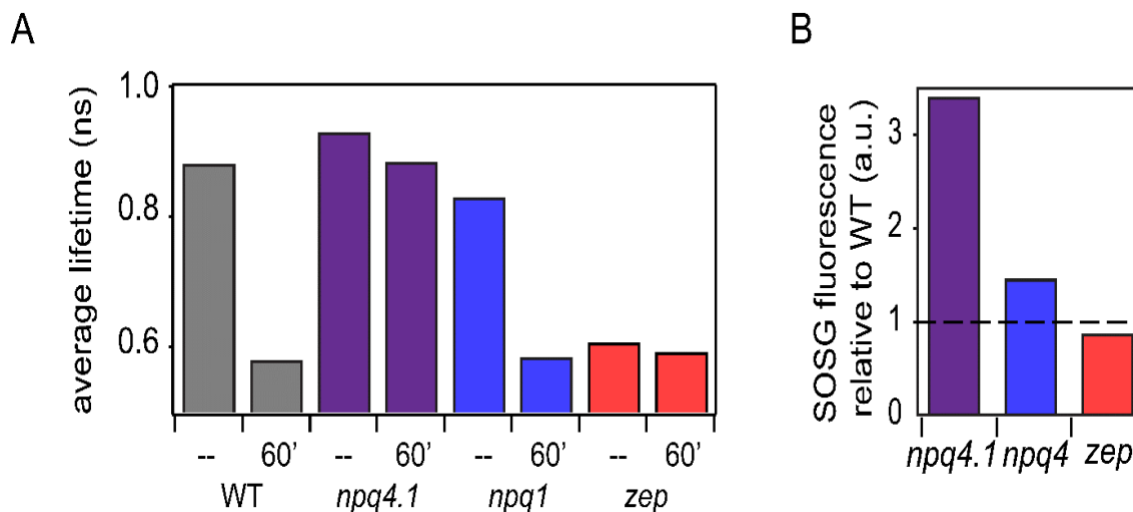

**Figure 3. Fluorescence lifetime decay of *Chlamydomonas reinhardtii* whole cells at 77K and singlet oxygen formation.** (A) Fluorescence lifetimes were measured on high light (600  $\mu\text{mol m}^{-2}\text{s}^{-1}$ ) acclimated samples. Each genotype was measured at a dark-adapted state (--) or after 60 minutes of high light treatment (2000  $\mu\text{mol m}^{-2}\text{s}^{-1}$ , 60'). WT samples shown here are 4A+ strain. Similar results were obtained in the case of CC4349 strain. The *npq4 lhcsr1* mutant is indicated here as *npq4.1*. Fluorescence lifetime traces for all genotypes and light conditions are shown in Figure 3—figure supplement 1 and 2 with fit values in Figure 3 – table supplement 1. (B) Singlet oxygen production rates for high light acclimated samples relative to WT (4A+ for *npq1* and *npq4 lhcsr1*, CC4349 for *zep*). Dotted line represents WT level at 1. The results reported are representative of three independent biological replicates for each genotype in LL or HL. Original data are reported in figure supplement 3. Singlet oxygen kinetics are shown in Figure 3 – figure supplement 3. Low light acclimated samples are shown in Figure 3—figure supplement 4.

In the stop-LHCSR3, the equilibrium free energy differences for the Zea-dependent (faster) component is similar to the wild type samples (Figure 2G). This is consistent with the Vio/Zea-Chl *a* 602-603 site as the major contributor for this component. Although qualitatively similar, there is a small decrease ( $<200 \text{ cm}^{-1}$ ) in the stabilization of the

367 quenched state upon Zea incorporation. This difference suggests that the C-terminal tail  
368 has an allosteric effect throughout the protein.

369

370 The static component, which is assigned to unquenched emitters in the active state and  
371 partially photobleached ones in the quenched state, has a large contribution to the  
372 correlation profiles (Figure 2—table supplement 1). The large amplitude is consistent  
373 with the low number of Cars available to interact with the Chls and thus the presence of  
374 several unquenched emissive Chl *a*. Given the structural arrangement of the Cars and  
375 Chls, the static component is likely due to Chls 604, 608 and 609, which sit far from the  
376 Cars.

377

378 **Roles of pH and Zea in fluorescence lifetime in vivo.** Quenching mechanisms were  
379 further investigated in vivo by measuring fluorescence emission lifetimes of whole cells  
380 acclimated to low or high light at 77K, as traditional NPQ measurements can be affected  
381 by artifacts (Tietz et al. 2017). Under these conditions, the photochemical activity is  
382 blocked and by following the emission at 680 nm it is possible to specifically investigate  
383 the kinetics of PSII, the main target of NPQ. Cells were either grown in low or high light,  
384 which determines the level of LHCSR protein (Figure 1—figure supplement 1 and 2) and  
385 the fluorescence lifetime was recorded before and after exposure to 60 minutes of high  
386 light (1500  $\mu$ E), which induces  $\Delta$ pH and determines the level of Zea. These light  
387 conditions, combined with the genotypes generated, enabled studies that partially or fully  
388 separated the contributions of the different components of NPQ.

389

390 Whole cell fluorescence lifetime traces show that LHCSR is necessary for NPQ in *C.*  
391 *reinhardtii*. WT and *npq1*, which lacks Zea, cells grown in high light show a faster  
392 fluorescence decay, or an increase in quenching, after exposure to 60 minutes of high  
393 light (Figure 3A, gray bars, fluorescence decays and fits to data shown in SI). For *npq4*  
394 *lhcsr1* cells, which lack LHCSR, similar fluorescence decay kinetics were measured  
395 regardless of light treatment (Figure 3A, purple), which is comparable to the unquenched  
396 kinetics of WT cells. WT and *npq1* cells grown in control light (low LHCSR content)

397 remain unquenched, even after exposure to 60 minutes of high light (Figure 3—figure  
398 supplement 1 and 2). These results are consistent with the NPQ measurements shown in  
399 Figure 1A. Similar to WT, *npq1* cells grown in high light show a faster fluorescence  
400 decay after exposure to 60 minutes of high light (Figure 3A, blue bars). While the results  
401 from WT show a role for pH and/or Zea in light-induced quenching in LHCSR3, the  
402 results from the *npq1* strain show that quenching can occur without Zea, *i.e.*, induced by  
403 the pH drop alone.

404

405 The *zep* mutant presented a similar decay among all samples, regardless of high or low  
406 light acclimation or light treatment, that was much faster, or more quenched, compared to  
407 the decay of dark-adapted WT (Figure 3A, red, Figure 3—figure supplement 1 and 2).  
408 These results indicate a constitutive quenching upon Zea accumulation, consistent with  
409 the pH-independent quenching observed in the results in Figure 1A and 1D and Figure 2E  
410 and 2F. However, the constitutive quenching observed in the *zep* mutant was unchanged  
411 in low vs. high light acclimated *zep* cells suggesting that the Zea dependent quenching  
412 observed in *zep* mutants is a more general process as opposed to one that occurs solely in  
413 LHCSR3.

414

415 **Role of Zea and NPQ in photoprotection.** The main function of quenching the Chl  
416 singlet excited states is to alleviate the excitation energy pressure on the photosynthetic  
417 apparatus, thereby preventing ROS formation and subsequent photoinhibition of their  
418 primary target, PSII. Singlet oxygen is the main ROS species formed at the level of PSII.  
419 In order to correlate the NPQ levels and quenching measured with ROS formation,  
420 singlet oxygen production was recorded in the different genotypes herein investigated  
421 (Figure 3B, Figure 3—figure supplement 3 and 4). As expected from the low level of  
422 NPQ induction, *npq4 lhcsr1*, which lacks LHCSR, demonstrated the highest level of  
423 singlet oxygen production, regardless of light treatment. Interestingly, the effect of Zea  
424 was almost negligible in high light acclimated samples (with a very high NPQ induction).  
425 Notably, the amount of singlet oxygen production was correlated with average lifetime

426 (Figure 3A), *i.e.*, inversely correlated with quenching, confirming that the quenching of  
427 Chl singlet excited states investigated here plays a role in photoprotection.

428

429

### 430 **Discussion**

431 This work leverages *in vivo* and *in vitro* experimental approaches to investigate NPQ  
432 mechanisms in *C. reinhardtii* and the molecular parameters responsible for their  
433 activation. In higher plants, both lumen acidification and Zea accumulation have been  
434 long understood to play a role in the induction of NPQ. While lumen acidification was  
435 thought to play a similar role in *C. reinhardtii*, here we characterize the impact of Zea  
436 accumulation, which had previously been elusive. We further identify the likely the  
437 molecular mechanisms of both pH and Car composition.

438

439 Both our *in vivo* and *in vitro* results point to pH and Zea controlling separate quenching  
440 processes that independently provide photoprotection. Full light-induced quenching upon  
441 lumen acidification in the *npq1* strain, which lacks Zea, and the full constitutive  
442 quenching in the *zep* strain, which is Zea-enriched, demonstrate two separate quenching  
443 and induction processes *in vivo*. Likewise, the 2D-FLC analysis on single LHCSR3  
444 quantified two parallel dynamic components, or separate quenching processes, one of  
445 which is pH-dependent and the other Zea-dependent.

446

447 For pH-dependent quenching, our 2D-FLC results, along with previous mutagenesis,  
448 (Perozeni et al. 2019) point to Lut-Chl613 as the likely quenching site. Analysis of stop-  
449 LHCSR3, which lack the protonable residues in the C terminus, definitively shows that  
450 the C terminus controls quenching activity by pH-induced stabilization of the quenched  
451 conformation of LHCSR3. The 2D-FLC results show that removal of the C-terminal tail  
452 removes pH-dependent quenching, while leaving Zea-dependent quenching nearly  
453 unaffected. Analogously, the WT low light grown strains, which lack LHCSR, also lack  
454 the ability for NPQ induction, supporting the critical role of the protonable residues  
455 unique to LHCSR in activating quenching.



456

457 For *Zea*-dependent quenching, we observe a constitutive quenching process both in vivo  
458 and in vitro that we assign to the Vio/*Zea*-Chl *a*602-603 site. Constitutive, as opposed to  
459 the typical inductive quenching, represents a distinct timescale and mechanism for the  
460 effect of *Zea*. The *Zea*-dependent quenching mechanism is described at the molecular  
461 level in the case of LHCSR3 but it likely shared with our LHC proteins: indeed, a strong  
462 reduction of fluorescence lifetime can be observed in whole cells in the case of *zep*  
463 mutant, even in low light acclimated cells where the amount of LHCSR3 is minimal  
464 (Figure 3—figure supplement 1 and 2). This demonstrates that LHCSR subunits are not  
465 the sole quenching site where *Zea*-dependent quenching occurs, consistent with previous  
466 work implicating the minor antenna complexes (Cazzaniga et al. 2020). It is important to  
467 note that in the case of *zep* mutant, not only does *Zea* completely substitute Vio (de-  
468 epoxidation index is 1, Figure 1 — figure supplement 3), but also the *Zea*/Chl ratio is  
469 much higher compared to the ratio observed in WT or *npq4 lhcsr1*. This suggests an  
470 alternative possibility where the strong quenching observed in the *zep* mutant could be  
471 related to accumulation of *Zea* in the thylakoid membrane changing the environment  
472 where the photosystems and light-harvesting complexes are embedded, inducing the  
473 latter to a strong quenched state. While both possibilities allow for constitutive quenching  
474 in the presence of *Zea*, it is the constitutive quenching itself that is potentially the origin  
475 of the conflicting results in the literature.

476

477 Taken together, the in vivo and in vitro results demonstrate that separate pH- and *Zea*-  
478 dependent quenching processes exist and both provide efficient photoprotection. While in  
479 vivo measurements suggest that pH-dependent quenching is often dominant over *Zea*-  
480 dependent quenching, and correspondingly more efficient in photoprotection, the  
481 conformational states and pigment pairs likely responsible function in parallel via similar  
482 mechanisms. However, the timescales and induction associated with each quenching  
483 process are distinct; responsive pH-dependent quenching works in combination with the  
484 guaranteed safety valve of *Zea*-dependent quenching, potentially to protect against a  
485 rapid return to high light conditions.

486

## 487 **Materials and Methods**

488 **Strains and culture conditions.** *C. reinhardtii* WT (4A+and CC4349) and mutant strains  
489 (*npq1*, *npq4 lhcsr1* in 4A+background, *zep* in CC4349 background) were grown at 24°C  
490 under continuous illumination with white LED light at 80  $\mu\text{mol photons m}^{-2} \text{s}^{-1}$  (low  
491 light, LL) in high salts (HS) medium (Harris et al. 2008) on a rotary shaker in Erlenmeyer  
492 flasks. High light (HL) acclimation was induced by growing cells for 2 weeks at 500  
493  $\mu\text{mol photons m}^{-2} \text{s}^{-1}$  in HS.

494

495 **SDS-PAGE Electrophoresis and Immunoblotting.** SDS-PAGE analysis was  
496 performed using the Tris-Tricine buffer system (Schägger et al. 1987). Immunoblotting  
497 analysis was performed using  $\alpha\text{CP43}$  (AS11 1787),  $\alpha\text{PSAA}$  (AS06 172) and  $\alpha\text{LHCSR3}$   
498 (AS14 2766) antibodies purchased from Agrisera (Sweden).

499

500 **Violaxanthin de-epoxidation kinetics and pigment analysis.** Violaxanthin de-  
501 epoxidation kinetics were performed by illuminating the different genotypes with red  
502 light at 1500  $\mu\text{mol photons m}^{-2} \text{s}^{-1}$  up to 60 minutes. Pigments were extracted 80%  
503 acetone and analysed by HPLC as described in (Lagarde et al. 2000).

504

505 **NPQ and electrochromic shift measurements.** NPQ induction curves were measured  
506 on 60 minutes dark adapted intact cells with a DUAL-PAM-100 fluorimeter (Heinz-  
507 Walz) at room temperature in a 1x1 cm cuvette mixed by magnetic stirring. Red  
508 saturating light of 4000  $\mu\text{mol photons m}^{-2} \text{s}^{-1}$  and red actinic light of 1500  $\mu\text{mol photons}$   
509  $\text{m}^{-2} \text{s}^{-1}$  were respectively used to measure  $F_m$  and  $F_m'$  at the different time points. NPQ  
510 was then calculated as  $F_m/F_m' - 1$ . Proton motive force upon exposure to different light  
511 intensities was measured by Electrochromic Shift (ECS) with MultispeQ v2.0  
512 (PhotosynQ) according to Kuhlert, S. et al. MultispeQ Beta: A tool for large-scale plant  
513 phenotyping connected to the open photosynQ network (Kuhlert et al. 2016).

514

515 **LHCSR3 WT and Stop proteins refolding for in vitro analysis.** pETmHis containing  
516 LHCSR3 CDS previously cloned as reported in Perozeni et al. 2019 served as template to  
517 produce Stop mutant using Agilent QuikChange Lightning Site-Directed Mutagenesis  
518 Kit. Primer TGGCTCTGCGCTTCTAGAAGGAGGCCATTCT and primer  
519 GAATGGCCTCCTTCTAGAAGCGCAGAGCCA were used to insert a premature stop  
520 codon to replace residue E231, generating a protein lacking 13 c-terminal residues.  
521 LHCSR3 WT and Stop protein were overexpressed in BL21 *E. coli* and refolded *in vitro*  
522 in presence of pigments as previously reported (Bonente et al. 2011). Pigments used for  
523 refolding were extracted from spinach thylakoids. Vio or Zea-binding versions of  
524 LHCSR3 were obtained using Vio or Zea containing pigment extracts in the refolding  
525 procedure. Zea-containing pigments were obtained by *in vitro* de-epoxidation (de la Cruz  
526 Valbuena et al. 2019, Pinnola et al. 2017) Fluorescence emission at 300K with excitation  
527 at 440 nm, 475 nm and 500 nm was used to evaluate correct folding as previously  
528 reported (Ballottari et al. 2010).

529

530 **Single-molecule fluorescence spectroscopy.** 12  $\mu$ M solutions of purified LHCSR3  
531 complexes were stored at  $-80^{\circ}\text{C}$ . Immediately prior to experiments, LHCSR3 samples  
532 were thawed over ice and diluted to 50 pM using buffer containing 0.05% n-dodecyl- $\alpha$ -  
533 D-maltoside and either 20 mM HEPES-KOH (pH 7.5) or 40 mM MES-NaOH (pH 5.0).  
534 The following enzymatic oxygen-scavenging systems were also used: (1) 25 nM  
535 protocatechuate-3,4-dioxygenase and 2.5 mM protocatechuic acid for pH 7.5 and (2) 50  
536 nM pyranose oxidase, 100 nM catalase and 5 mM glucose for pH 5.0.(Aitken et al. 2008,  
537 Swoboda et al. 2012) Diluted solutions were incubated for 15 minutes on Ni-NTA coated  
538 coverslips (Ni\_01, Microsurfaces) fitted with a Viton spacer to allow LHCSR3  
539 complexes to attach to the surface via their His-tag. The sample was rinsed several times  
540 to remove unbound complexes and sealed with another coverslip.

541

542 Single-molecule fluorescence measurements were performed in a home-built confocal  
543 microscope. A fiber laser (FemtoFiber pro, Toptica; 130 fs pulse duration, 80 MHz  
544 repetition rate) was tuned to 610 nm and set to an excitation power of 350 nW (2560

545 nJ/cm<sup>2</sup> at the sample plane, assuming a Gaussian beam). Sample excitation and  
546 fluorescence collection were accomplished by the same oil-immersion objective  
547 (UPLSAPO100XO, Olympus, NA 1.4). The fluorescence signal was isolated using two  
548 bandpass filters (ET690/120x and ET700/75m, Chroma). The signal was detected using  
549 an avalanche photodiode (SPCM-AQRH-15, Excelitas) and photon arrival times were  
550 recorded using a time-correlated single photon counting module (PicoHarp 300,  
551 Picoquant). The instrument response function was measured from scattered light to be  
552 380 ps (full width at half maximum). Fluorescence intensity was analyzed as described  
553 previously using a change-point-finding algorithm (Watkins et al. 2005). Fluorescence  
554 emission was recorded until photobleaching for the following number of LHCSR3 in  
555 each sample: 132 LHCSR3-Vio at pH 7.5 ( $1.6 \cdot 10^7$  photons); 173 LHCSR3-Vio at pH 5.5  
556 ( $1.3 \cdot 10^7$  photons); 95 LHCSR3-Zea at pH 7.5 ( $1.4 \cdot 10^7$  photons); 216 LHCSR3-Zea at pH  
557 5.5 ( $9.0 \cdot 10^6$  photons); 125 stop-LHCSR3-Vio at pH 7.5 ( $2.5 \cdot 10^7$  photons); 130 stop-  
558 LHCSR3-Vio at pH 5.5 ( $7.9 \cdot 10^6$  photons); 148 stop-LHCSR3-Zea at pH 7.5 ( $1.3 \cdot 10^7$   
559 photons); 116 stop-LHCSR3-Zea at pH 5.5 ( $9.9 \cdot 10^6$  photons). Each data set was collected  
560 over two or three days for technical replicates and the distribution generated each day  
561 was evaluated for consistency.

562

563 **2D Fluorescence lifetime correlation analysis.** 2D fluorescence lifetime correlation  
564 analysis was performed as detailed previously (Kondo et al. 2019). Briefly, we performed  
565 the following analysis. First, the total number of states exhibiting distinct fluorescence  
566 lifetimes was estimated from the 1D lifetime distribution. The lifetime distribution is  
567 determined using the maximum entropy method (MEM) to perform a 1D inverse Laplace  
568 transform (1D-ILT) of the 1D fluorescence lifetime decay (Ishii et al. 2013a). Next, a 2D  
569 fluorescence decay (2D-FD) matrix was constructed by plotting pairs of photons  
570 separated by  $\Delta T$  values ranging from  $10^{-4}$  to 10 seconds. The 2D-FD matrix was  
571 transformed from t-space to the 2D fluorescence lifetime correlation (2D-FLC) matrix in  
572  $\tau$ -space using a 2D-ILT by MEM fitting (Ishii et al. 2012, 2013a, b). The 2D-FLC matrix  
573 is made up of two functions: the fluorescence lifetime distribution, A, and the correlation  
574 function, G. In practice, the initial fluorescence lifetime distribution,  $A_0$ , was estimated

575 from the 2D-MEM fitting of the 2D-FD at the shortest  $\Delta T$  ( $10^{-4}$  s). Then the correlation  
576 matrix,  $G_0$ , was estimated at all  $\Delta T$  values with  $A_0$  as a constant.  $A_0$  and  $G_0$ , along with  
577 the state lifetime values determined from the 1D analysis, were used as initial parameters  
578 for the global fitting of the 2D-FDs at all  $\Delta T$  values.  $A$  was treated as a global variable  
579 and  $G$  was treated as a local variable at each  $\Delta T$  (now  $G(\Delta T)$ ). The resulting fit provides  
580 the correlation function,  $G(\Delta T)$ . The correlation function was normalized with respect to  
581 the total photon number in each state. Each set of correlation curves (auto- and cross-  
582 correlation for one sample) were globally fit using the following model function:

$$583 \quad G_{ij}^s(\Delta T) = q^2 J^2 I \cdot \sum_x \left( \left[ \sum_{y \neq x} \{E_y \cdot \Phi_y \cdot R_y(\infty)\} + E_x \cdot \Phi_y \cdot R_x(\Delta T) \right] \cdot [E_x \cdot \Phi_x \cdot C_x] \right)$$

584 This equation accounts for multiple, independent emitters within one protein (multiple  
585 components). Here,  $x$  and  $y$  indicate the component number,  $i$  and  $j$  indicate the state  
586 (auto correlation for  $i=j$ , cross correlation for  $i \neq j$ ),  $q$  accounts for experimental factors  
587 such as the detection efficiency, filter transmittance, gain of the detector, etc.,  $J$  is the  
588 laser power, and  $I$  is the total photon number proportional to the total measurement time.  
589  $E$ ,  $\Phi$ , and  $C$  are diagonal matrices composed of the optical extinction coefficient,  
590 fluorescence quantum yield, and state population, respectively.  $R$  is a matrix element that  
591 is related to the rate matrix.

592

593 The rate constants determined from the 2D-FLC analysis were used to calculate the free  
594 energies for each protein state shown in Figure 2A-C and 2E-G. The rate constants for  
595 transitions between the quenched and active states are related to the free energies  
596 associated with both states through the Arrhenius equation:

$$597 \quad k_{Q \rightarrow A} = A \exp\left(-\frac{E_{Q \rightarrow A}^*}{k_B T}\right) \quad [1]$$

$$598 \quad k_{A \rightarrow Q} = A \exp\left(-\frac{E_{A \rightarrow Q}^*}{k_B T}\right) \quad [2]$$

599 Here,  $k_{Q \rightarrow A}$  and  $E_{Q \rightarrow A}^*$  ( $k_{A \rightarrow Q}$  and  $E_{A \rightarrow Q}^*$ ) are the rate constant and activation energy,  
600 respectively, for the transition from the quenched (Q) to the active (A) state.  $A$  is a

601 constant,  $k_B$  is the Boltzmann constant, and T is the temperature. Upon equilibration of  
602 the Q and A states, the free-energy difference,  $\Delta E^*$ , is given by the following equation:

603 
$$\frac{k_{Q \rightarrow A}}{k_{A \rightarrow Q}} = \exp\left(-\frac{\Delta E^*}{k_B T}\right) \quad [3]$$

604 Using the dynamic rates determined from the fits to the correlation function, we  
605 calculated  $\Delta E^*$  at T = 300 K. The free-energy differences between the quenched and  
606 active states are shown as the energetic differences between the minima in the energy  
607 landscapes shown in Figure 2. The potential barriers were scaled by assuming the  
608 constant A in Equations [1] and [2] to be 1000, which was shown previously to be a  
609 reasonable estimate for LHCSR1 (Kondo et al. 2019).

610

611 **77K fluorescence.** Low temperature quenching measures were performed according to  
612 Perozeni, et. al (Perozeni et al. 2019). Cells were frozen in liquid nitrogen after being  
613 dark adapted or after 60 minutes of illumination at 1500  $\mu\text{mol photons m}^{-2} \text{ s}^{-1}$  of red  
614 light. Fluorescence decay kinetics were then recorded by using Chronos BH ISS Photon  
615 Counting instrument with picosecond laser excitation at 447 nm operating at 50 MHz.  
616 Fluorescence emissions were recorded at 680 nm in with 4 nm bandwidth. Laser power  
617 was kept below 0.1  $\mu\text{W}$ .

618

### 619 **Competing interests**

620 The authors declare no competing interests.

621

### 622 **References**

- 623 Ahn, T. K., T. J. Avenson, M. Ballottari, Y. C. Cheng, K. K. Niyogi, R. Bassi, and G. R.  
624 Fleming. 2008. "Architecture of a charge-transfer state regulating light harvesting  
625 in a plant antenna protein." *Science* no. 320 (5877):794-797. doi:  
626 10.1126/science.1154800.
- 627 Aitken, C. E., R. A. Marshall, and J. D. Puglisi. 2008. "An Oxygen Scavenging System  
628 for Improvement of Dye Stability in Single-Molecule Fluorescence Experiments."  
629 *Biophys. J.* no. 94 (5):1826-1835. doi: 10.1529/biophysj.107.117689.
- 630 Baek, K., D. H. Kim, J. Jeong, S. J. Sim, A. Melis, J. S. Kim, E. Jin, and S. Bae. 2016.  
631 "DNA-free two-gene knockout in *Chlamydomonas reinhardtii* via CRISPR-Cas9  
632 ribonucleoproteins." *Scientific Reports* no. 6. doi: 3062010.1038/srep30620.

- 633 Bailleul, Benjamin, Pierre Cardol, Cécile Breyton, and Giovanni Finazzi. 2010.  
634 "Electrochromism: a useful probe to study algal photosynthesis." *Photosynthesis*  
635 *research* no. 106 (1-2):179.
- 636 Ballottari, M., T. B. Truong, E. De Re, E. Erickson, G. R. Stella, G. R. Fleming, R. Bassi,  
637 and K. K. Niyogi. 2016. "Identification of pH-sensing Sites in the Light  
638 Harvesting Complex Stress-related 3 Protein Essential for Triggering Non-  
639 photochemical Quenching in *Chlamydomonas reinhardtii*." *Journal of Biological*  
640 *Chemistry* no. 291 (14):7334-7346. doi: 10.1074/jbc.M115.704601.
- 641 Ballottari, Matteo, Julien Girardon, Nico Betterle, Tomas Morosinotto, and Roberto  
642 Bassi. 2010. "Identification of the chromophores involved in aggregation-  
643 dependent energy quenching of the monomeric photosystem II antenna protein  
644 Lhcb5." *Journal of Biological Chemistry* no. 285 (36):28309-28321.
- 645 Bonente, G., M. Ballottari, T. B. Truong, T. Morosinotto, T. K. Ahn, G. R. Fleming, K.  
646 K. Niyogi, and R. Bassi. 2011. "Analysis of LhcSR3, a Protein Essential for  
647 Feedback De-Excitation in the Green Alga *Chlamydomonas reinhardtii*." *Plos*  
648 *Biology* no. 9 (1). doi: ARTN e100057710.1371/journal.pbio.1000577.
- 649 Cazzaniga, Stefano, Minjae Kim, Francesco Bellamoli, Jooyoen Jeong, Sangmuk Lee,  
650 Federico Perozeni, Andrea Pompa, EonSeon Jin, and Matteo Ballottari. 2020.  
651 "Photosystem II antenna complexes CP26 and CP29 are essential for  
652 nonphotochemical quenching in *Chlamydomonas reinhardtii*." *Plant, cell &*  
653 *environment* no. 43 (2):496-509.
- 654 de la Cruz Valbuena, Gabriel, Franco V. A. Camargo, Rocio Borrego-Varillas, Federico  
655 Perozeni, Cosimo D'Andrea, Matteo Ballottari, and Giulio Cerullo. 2019.  
656 "Molecular Mechanisms of Nonphotochemical Quenching in the LHCSR3  
657 Protein of *Chlamydomonas reinhardtii*." *The Journal of Physical Chemistry*  
658 *Letters* no. 10 (10):2500-2505. doi: 10.1021/acs.jpcclett.9b01184.
- 659 Di Valentin, M., F. Biasibetti, S. Ceola, and D. Carbonera. 2009. "Identification of the  
660 Sites of Chlorophyll Triplet Quenching in Relation to the Structure of LHC-II  
661 from Higher Plants. Evidence from EPR Spectroscopy." *Journal of Physical*  
662 *Chemistry B* no. 113 (39):13071-13078. doi: 10.1021/jp904012j.
- 663 Dinc, Emine, Lijin Tian, Laura M Roy, Robyn Roth, Ursula Goodenough, and Roberta  
664 Croce. 2016. "LHCSR1 induces a fast and reversible pH-dependent fluorescence  
665 quenching in LHCI in *Chlamydomonas reinhardtii* cells." *Proc. Natl. Acad. Sci.*  
666 *U. S. A.* no. 113 (27):7673-7678.
- 667 Eskling, M., P. O. Arvidsson, and H. E. Akerlund. 1997. "The xanthophyll cycle, its  
668 regulation and components." *Physiologia Plantarum* no. 100 (4):806-816. doi:  
669 DOI 10.1111/j.1399-3054.1997.tb00007.x.
- 670 Girolomoni, Laura, Stefano Cazzaniga, Alberta Pinnola, Federico Perozeni, Matteo  
671 Ballottari, and Roberto Bassi. 2019. "LHCSR3 is a nonphotochemical quencher of  
672 both photosystems in *Chlamydomonas reinhardtii*." *Proceedings of the National*  
673 *Academy of Sciences* no. 116 (10):4212-4217.
- 674 Gwizdala, Michal, Rudi Berera, Diana Kirilovsky, Rienk Van Grondelle, and Tjaart PJ  
675 Krüger. 2016. "Controlling light harvesting with light." *Journal of the American*  
676 *Chemical Society* no. 138 (36):11616-11622.

- 677 Harris, E.H., and Harris. 2008. *Introduction to Chlamydomonas and its laboratory use*.  
678 Vol. 1, *The Chlamydomonas sourcebook*. San Diego: Academic press. Reprint,  
679 Not in File.
- 680 Ishii, K., and T. Tahara. 2012. "Extracting Decay Curves of the Correlated Fluorescence  
681 Photons Measured in Fluorescence Correlation Spectroscopy." *Chem. Phys. Lett.*  
682 no. 519-20:130-133. doi: 10.1016/j.cplett.2011.11.024.
- 683 Ishii, K., and T. Tahara. 2013a. "Two-Dimensional Fluorescence Lifetime Correlation  
684 Spectroscopy. 1. Principle." *J. Phys. Chem. B* no. 117 (39):11414-11422. doi:  
685 10.1021/jp406861u.
- 686 Ishii, K., and T. Tahara. 2013b. "Two-Dimensional Fluorescence Lifetime Correlation  
687 Spectroscopy. 2. Application." *J. Phys. Chem. B* no. 117 (39):11423-11432. doi:  
688 10.1021/jp406864e.
- 689 Jahns, P., and A. R. Holzwarth. 2012. "The role of the xanthophyll cycle and of lutein in  
690 photoprotection of photosystem II." *Biochimica Et Biophysica Acta-Bioenergetics*  
691 no. 1817 (1):182-193. doi: 10.1016/j.bbabi.2011.04.012.
- 692 Kondo, T., J. B. Gordon, A. Pinnola, L. Dall'Osto, R. Bassi, and G. S. Schlau-Cohen.  
693 2019. "Microsecond and Millisecond Dynamics in the Photosynthetic Protein  
694 LHCSR1 Observed by Single-Molecule Correlation Spectroscopy." *PNAS*.
- 695 Kondo, Toru, Alberta Pinnola, Wei Jia Chen, Luca Dall'Osto, Roberto Bassi, and  
696 Gabriela S Schlau-Cohen. 2017. "Single-molecule spectroscopy of LHCSR1  
697 protein dynamics identifies two distinct states responsible for multi-timescale  
698 photosynthetic photoprotection." *Nature chemistry* no. 9 (8):772.
- 699 Kromdijk, J., K. Glowacka, L. Leonelli, S. T. Gabilly, M. Iwai, K. K. Niyogi, and S. P.  
700 Long. 2016. "Improving photosynthesis and crop productivity by accelerating  
701 recovery from photoprotection." *Science* no. 354 (6314):857-861. doi:  
702 10.1126/science.aai8878.
- 703 Krüger, Tjaart PJ, Vladimir I Novoderezhkin, Cristian Ilieoaia, and Rienk Van Grondelle.  
704 2010. "Fluorescence spectral dynamics of single LHCII trimers." *Biophysical*  
705 *journal* no. 98 (12):3093-3101.
- 706 Krüger, Tjaart PJ, Emilie Wientjes, Roberta Croce, and Rienk van Grondelle. 2011.  
707 "Conformational switching explains the intrinsic multifunctionality of plant light-  
708 harvesting complexes." *Proceedings of the National Academy of Sciences* no. 108  
709 (33):13516-13521.
- 710 Kuhlger, Sebastian, Greg Austic, Robert Zegarac, Isaac Osei-Bonsu, Donghee Hoh,  
711 Martin I Chilvers, Mitchell G Roth, Kevin Bi, Dan TerAvest, Prabode Weebadde,  
712 and David M Kramer. 2016. "MultispeQ Beta: a tool for large-scale plant  
713 phenotyping connected to the open PhotosynQ network." *Royal Society open*  
714 *science* no. 3 (10):160592.
- 715 Lagarde, D., L. Beuf, and W. Vermaas. 2000. "Increased production of zeaxanthin and  
716 other pigments by application of genetic engineering techniques to *Synechocystis*  
717 sp. strain PCC 6803." *Appl Environ Microbiol* no. 66 (1):64-72.
- 718 Lampoura, S. S., V. Barzda, G. M. Owen, A. J. Hoff, and H. van Amerongen. 2002.  
719 "Aggregation of LHCII leads to a redistribution of the triplets over the central  
720 xanthophylls in LHCII." *Biochemistry* no. 41 (29):9139-9144. doi: UNSP  
721 BI025724X10.1021/bi025724x.



- 722 Li, ZR, G Peers, RM Dent, Y Bai, SY Yang, W Apel, L Leonelli, and KK Niyogi. 2016.  
723 "Evolution of an atypical de-epoxidase for photoprotection in the green lineage."  
724 *Nature Plants* no. 2 (10). doi: 10.1038/NPLANTS.2016.140.
- 725 Liao, Pen-Nan, Christoph-Peter Holleboom, Laura Wilk, Werner Kühlbrandt, and Peter J  
726 Walla. 2010. "Correlation of Car S<sub>1</sub>→ Chl with Chl→ Car S<sub>1</sub> energy transfer  
727 supports the excitonic model in quenched light harvesting complex II." *J. Phys.*  
728 *Chem. B* no. 114 (47):15650-15655.
- 729 Liguori, N, LM Roy, M Opacic, G Durand, and R Croce. 2013. "Regulation of Light  
730 Harvesting in the Green Alga *Chlamydomonas reinhardtii*: The C-Terminus of  
731 LHCSR Is the Knob of a Dimmer Switch." *Journal of the American Chemical*  
732 *Society* no. 135 (49):18339-18342. doi: 10.1021/ja4107463.
- 733 Liguori, N., V. Novoderezhkin, L. M. Roy, R. van Grondelle, and R. Croce. 2016.  
734 "Excitation dynamics and structural implication of the stress-related complex  
735 LHCSR3 from the green alga *Chlamydomonas reinhardtii*." *Biochimica Et*  
736 *Biophysica Acta-Bioenergetics* no. 1857 (9):1514-1523. doi:  
737 10.1016/j.bbabi.2016.04.285.
- 738 Liguori, N., X. Periole, S. J. Marrink, and R. Croce. 2015. "From light-harvesting to  
739 photoprotection: structural basis of the dynamic switch of the major antenna  
740 complex of plants (LHCII)." *Scientific Reports* no. 5. doi: ARTN  
741 1566110.1038/srep15661.
- 742 Liguori, N., P. Q. Xu, I. H. M. van Stokkum, B. van Oort, Y. H. Lu, D. Karcher, R. Bock,  
743 and R. Croce. 2017. "Different carotenoid conformations have distinct functions  
744 in light-harvesting regulation in plants." *Nature Communications* no. 8. doi:  
745 ARTN 199410.1038/s41467-017-02239-z.
- 746 Lum, K. K., J. Kim, and X. G. Lei. 2013. "Dual potential of microalgae as a sustainable  
747 biofuel feedstock and animal feed." *Journal of Animal Science and Biotechnology*  
748 no. 4. doi: Artn 5310.1186/2049-1891-4-53.
- 749 Ma, Ying-Zhong, Nancy E Holt, Xiao-Ping Li, Krishna K Niyogi, and Graham R  
750 Fleming. 2003. "Evidence for direct carotenoid involvement in the regulation of  
751 photosynthetic light harvesting." *Proc. Natl. Acad. Sci. U. S. A.* no. 100 (8):4377-  
752 4382.
- 753 Maruyama, Shinichiro, Ryutaro Tokutsu, and Jun Minagawa. 2014. "Transcriptional  
754 regulation of the stress-responsive light harvesting complex genes in  
755 *Chlamydomonas reinhardtii*." *Plant Cell Physiol.* no. 55 (7):1304-1310.
- 756 Mascoli, Vincenzo, Nicoletta Liguori, Pengqi Xu, Laura M Roy, Ivo HM van Stokkum,  
757 and Roberta Croce. 2019. "Capturing the quenching mechanism of light-  
758 harvesting complexes of plants by zooming in on the ensemble." *Chem* no. 5  
759 (11):2900-2912.
- 760 Mascoli, Vincenzo, Vladimir Novoderezhkin, Nicoletta Liguori, Pengqi Xu, and Roberta  
761 Croce. 2020. "Design principles of solar light harvesting in plants: Functional  
762 architecture of the monomeric antenna CP29." *Biochimica et Biophysica Acta*  
763 *(BBA)-Bioenergetics* no. 1861 (3):148156.
- 764 Muh, F., M. E. A. Madjet, and T. Renger. 2010. "Structure-Based Identification of  
765 Energy Sinks in Plant Light-Harvesting Complex II." *Journal of Physical*  
766 *Chemistry B* no. 114 (42):13517-13535. doi: 10.1021/jp106323e.

- 767 Nicol, Lauren, Wojciech J Nawrocki, and Roberta Croce. 2019. "Disentangling the sites  
768 of non-photochemical quenching in vascular plants." *Nat. Plants* no. 5 (11):1177-  
769 1183.
- 770 Niyogi, Krishna K, Olle Bjorkman, and Arthur R Grossman. 1997. "Chlamydomonas  
771 xanthophyll cycle mutants identified by video imaging of chlorophyll  
772 fluorescence quenching." *The Plant Cell* no. 9 (8):1369-1380.
- 773 Novoderezhkin, V., A. Marin, and R. van Grondelle. 2011. "Intra- and inter-monomeric  
774 transfers in the light harvesting LHCII complex: the Redfield-Forster picture."  
775 *Physical Chemistry Chemical Physics* no. 13 (38):17093-17103. doi:  
776 10.1039/c1cp21079c.
- 777 Park, S., C. J. Steen, D. Lyska, A. L. Fischer, B. Endelman, M. Iwai, K. K. Niyogi, and  
778 G. R. Fleming. 2019. "Chlorophyll-carotenoid excitation energy transfer and  
779 charge transfer in *Nannochloropsis oceanica* for the regulation of photosynthesis."  
780 *Proceedings of the National Academy of Sciences of the United States of America*  
781 no. 116 (9):3385-3390. doi: 10.1073/pnas.1819011116.
- 782 Peers, Graham, Thuy B Truong, Elisabeth Ostendorf, Andreas Busch, Dafna Elrad,  
783 Arthur R Grossman, Michael Hippler, and Krishna K Niyogi. 2009. "An ancient  
784 light-harvesting protein is critical for the regulation of algal photosynthesis."  
785 *Nature* no. 462 (7272):518-521.
- 786 Perozeni, F., S. Cazzaniga, and M. Ballottari. 2019. "In vitro and in vivo investigation of  
787 chlorophyll binding sites involved in non-photochemical quenching in  
788 *Chlamydomonas reinhardtii*." *Plant Cell and Environment* no. 42 (8):2522-2535.  
789 doi: 10.1111/pce.13566.
- 790 Pinnola, A., L. Dall'Osto, C. Gerotto, T. Morosinotto, R. Bassi, and A. Alboresi. 2013.  
791 "Zeaxanthin Binds to Light-Harvesting Complex Stress-Related Protein to  
792 Enhance Nonphotochemical Quenching in *Physcomitrella patens*." *Plant Cell* no.  
793 25 (9):3519-3534. doi: 10.1105/tpc.113.114538.
- 794 Pinnola, Alberta, Matteo Ballottari, Ilaria Bargigia, Marcelo Alcocer, Cosimo D'Andrea,  
795 Giulio Cerullo, and Roberto Bassi. 2017. "Functional modulation of LHCSR1  
796 protein from *Physcomitrella patens* by zeaxanthin binding and low pH." *Scientific*  
797 *reports* no. 7 (1):1-14.
- 798 Rochaix, J. D. 2014. "Regulation and Dynamics of the Light-Harvesting System." *Annual*  
799 *Review of Plant Biology, Vol 65* no. 65:287-309. doi: 10.1146/annurev-arplant-  
800 050213-040226.
- 801 Ruban, A. V., R. Berera, C. Iliaia, I. H. M. van Stokkum, J. T. M. Kennis, A. A. Pascal,  
802 H. van Amerongen, B. Robert, P. Horton, and R. van Grondelle. 2007.  
803 "Identification of a mechanism of photoprotective energy dissipation in higher  
804 plants." *Nature* no. 450 (7169):575-U22. doi: 10.1038/nature06262.
- 805 Sacharz, J., V. Giovagnetti, P. Ungerer, G. Mastroianni, and A. V. Ruban. 2017. "The  
806 xanthophyll cycle affects reversible interactions between PsbS and light-  
807 harvesting complex II to control non-photochemical quenching." *Nature Plants*  
808 no. 3 (2). doi: ARTN 1622510.1038/nplants.2016.225.
- 809 Schagger, H., and G. von Jagow. 1987. "Tricine-sodium dodecyl sulfate-polyacrylamide  
810 gel electrophoresis for the separation of proteins in the range from 1 to 100 kDa."  
811 *Anal.Biochem.* no. 166:368-379.

- 812 Schlau-Cohen, G. S., T. R. Calhoun, N. S. Ginsberg, E. L. Read, M. Ballottari, R. Bassi,  
813 R. van Grondelle, and G. R. Fleming. 2009. "Pathways of Energy Flow in LHCII  
814 from Two-Dimensional Electronic Spectroscopy." *Journal of Physical Chemistry*  
815 *B* no. 113 (46):15352-15363. doi: 10.1021/jp9066586.
- 816 Schlau-Cohen, G. S., H. Y. Yang, T. P. J. Kruger, P. Q. Xu, M. Gwizdala, R. van  
817 Grondelle, R. Croce, and W. E. Moerner. 2015. "Single-Molecule Identification  
818 of Quenched and Unquenched States of LHCII." *J. Phys. Chem. Lett.* no. 6  
819 (5):860-867. doi: 10.1021/acs.jpcclett.5b00034.
- 820 Schlau-Cohen, Gabriela S, Samuel Bockenhauer, Quan Wang, and WE Moerner. 2014.  
821 "Single-molecule spectroscopy of photosynthetic proteins in solution: Exploration  
822 of structure–function relationships." *Chemical Science* no. 5 (8):2933-2939.
- 823 Son, Minjung, Alberta Pinnola, Samuel C Gordon, Roberto Bassi, and Gabriela S Schlau-  
824 Cohen. 2020. "Observation of dissipative chlorophyll-to-carotenoid energy  
825 transfer in light-harvesting complex II in membrane nanodiscs." *Nature*  
826 *Communications* no. 11 (1):1-8.
- 827 Son, Minjung, Alberta Pinnola, and Gabriela S Schlau-Cohen. 2020. "Zeaxanthin  
828 independence of photophysics in light-harvesting complex II in a membrane  
829 environment." *Biochimica et Biophysica Acta (BBA)-Bioenergetics*:148115.
- 830 Swoboda, M., J. Henig, H. M. Cheng, D. Brugger, D. Haltrich, N. Plumere, and M.  
831 Schlierf. 2012. "Enzymatic Oxygen Scavenging for Photostability without pH  
832 Drop in Single-Molecule Experiments." *ACS Nano* no. 6 (7):6364-6369. doi:  
833 10.1021/nm301895c.
- 834 Tian, Lijin, Wojciech J Nawrocki, Xin Liu, Iryna Polukhina, Ivo HM Van Stokkum, and  
835 Roberta Croce. 2019. "pH dependence, kinetics and light-harvesting regulation of  
836 nonphotochemical quenching in *Chlamydomonas*." *Proceedings of the National*  
837 *Academy of Sciences* no. 116 (17):8320-8325.
- 838 Tietz, Stefanie, Christopher C Hall, Jeffrey A Cruz, and David M Kramer. 2017. "NPQ  
839 (T): a chlorophyll fluorescence parameter for rapid estimation and imaging of  
840 non-photochemical quenching of excitons in photosystem-II-associated antenna  
841 complexes." *Plant, Cell & Environment* no. 40 (8):1243-1255.
- 842 Tokutsu, Ryutaro, and Jun Minagawa. 2013. "Energy-dissipative supercomplex of  
843 photosystem II associated with LHCSR3 in *Chlamydomonas reinhardtii*." *Proc.*  
844 *Natl. Acad. Sci. U. S. A.* no. 110 (24):10016-10021.
- 845 Vidal-Meireles, André, Dávid Tóth, László Kovács, Juliane Neupert, and Szilvia Z Tóth.  
846 2020. "Ascorbate Deficiency Does Not Limit Nonphotochemical Quenching in  
847 *Chlamydomonas reinhardtii*." *Plant Physiol.* no. 182 (1):597-611.
- 848 Watkins, Lucas P, and Haw Yang. 2005. "Detection of intensity change points in time-  
849 resolved single-molecule measurements." *The Journal of Physical Chemistry B*  
850 no. 109 (1):617-628.
- 851 Wijffels, R. H., and M. J. Barbosa. 2010. "An Outlook on Microalgal Biofuels." *Science*  
852 no. 329 (5993):796-799. doi: 10.1126/science.1189003.
- 853 Zhu, Xin-Guang, Stephen P Long, and Donald R Ort. 2010. "Improving photosynthetic  
854 efficiency for greater yield." *Annual review of plant biology* no. 61:235-261.  
855

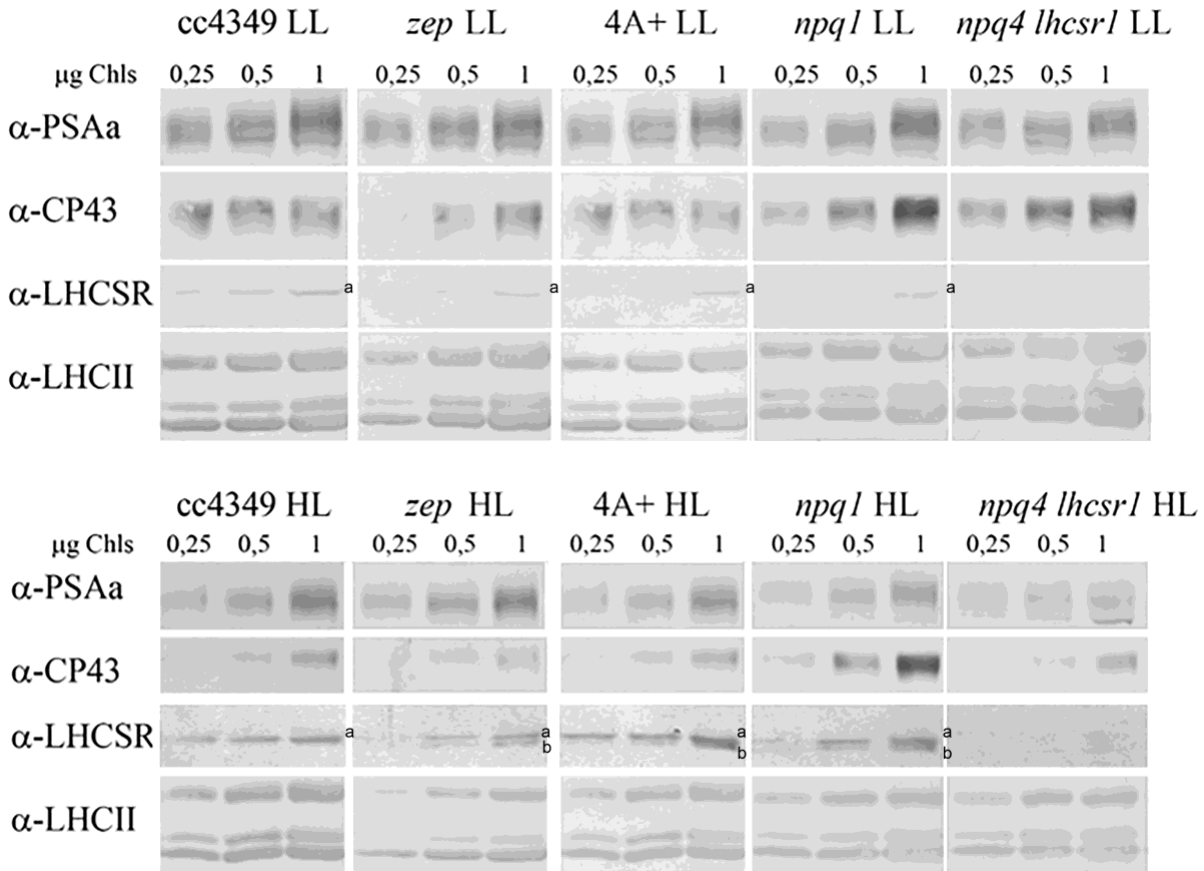

**Figure 1—figure supplement 1.** Immunoblot analysis of LHCSR accumulation in vivo. Total protein extracts from low Light (LL) or high light (HL) acclimated cells were loaded on a chlorophyll basis ( $\mu\text{g}$  of chlorophylls loaded are reported in the figure). Immunoblot analysis was performed using specific antibodies recognizing PsaA, CP43, LHCSR3 (a) and LHCII subunits. The filter used for LHCSR3 detection was then used for LHCSR1 (b) detection using specific antibody. The results reported are representative of two independent experiments with different biological replicates and three technical replicates for each genotype in low light (LL) or high light (HL).

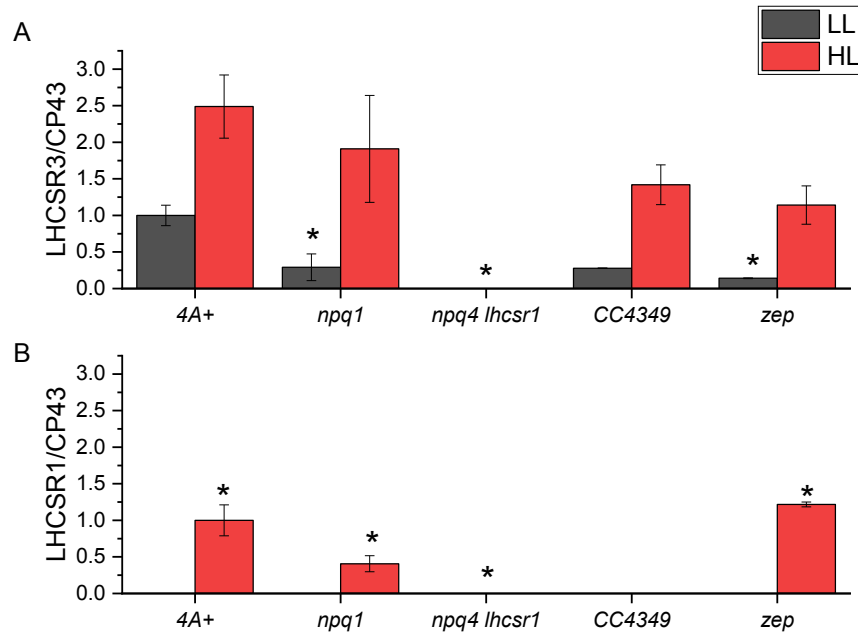

**Figure 1—figure supplement 2.** Quantification of LHCSR3 and LHCSR1 accumulation per PSII. Immunoblotting results were analyzed by densitometry. LHCSR3 (A) and LHCSR1 (B) content was then normalized to the amount of CP43 as a reference for PSII. The results obtained were then normalized to the 4A+ LL case in the case of LHCSR3 and 4A+ HL case in the case of LHCSR1. The results reported are representative of two independent experiments with different biological replicates and three technical replicates for each genotype in low light (LL) or high light (HL). Error bars are reported as standard deviation. The statistical significance of differences compared to WT (4A+ for *npq1* and *npq4 lhcsr1* mutants, CC4349 for *zep* mutant) is indicated as \* ( $p < 0.05$ ), as determined by unpaired two sample t-test (N=3).

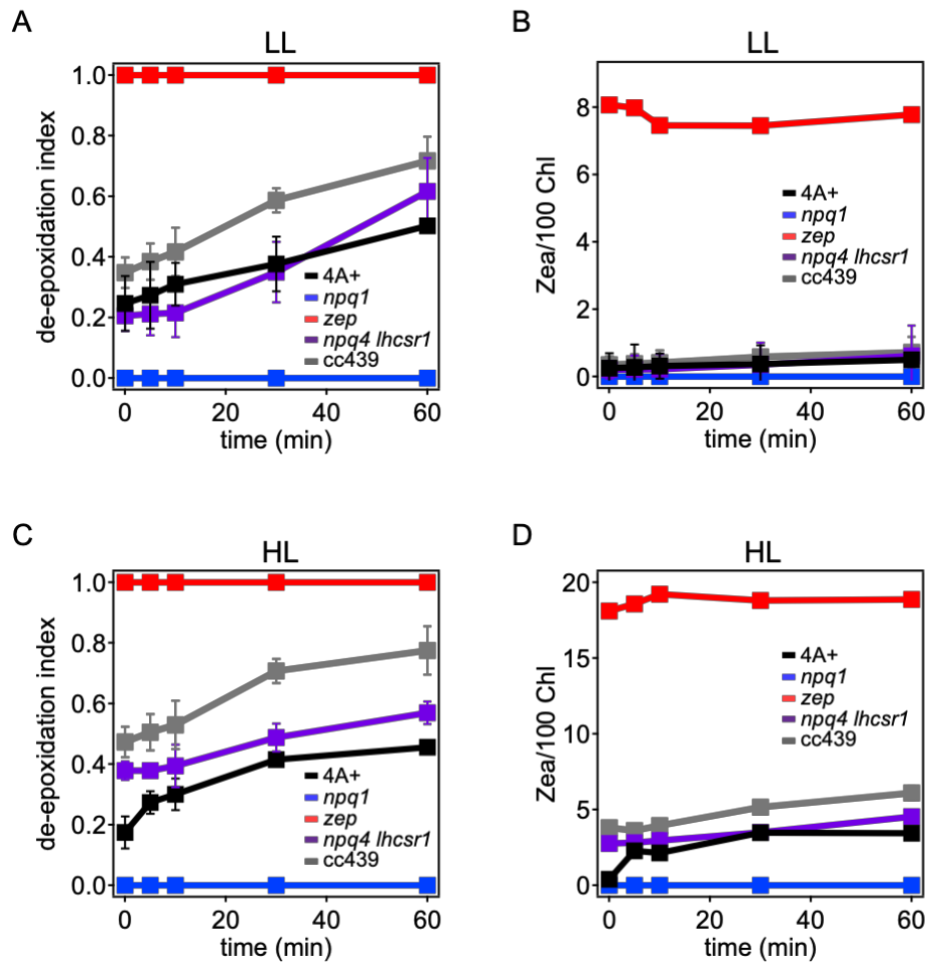

**Figure 1—figure supplement 3.** Violaxanthin de-epoxidation kinetics in *Chlamydomonas reinhardtii* WT and mutant strains. Violaxanthin de-epoxidation kinetics were measured upon 60 minutes of strong light treatment (red light  $1500 \mu\text{mol m}^{-2}\text{s}^{-1}$ ) of low light (LL) or high light (HL) acclimated cells. Panel A, C: de-epoxidation indexes at different time points. Panel B, D: zeaxanthin content per 100 chlorophylls. De-epoxidation index was calculated from the molar concentration of zeaxanthin, anteraxanthin and violaxanthin as  $([\text{zeaxanthin}] + [\text{anteraxanthin}]/2)/([\text{zeaxanthin}] + [\text{anteraxanthin}] + [\text{violaxanthin}])$ . The results reported are representative of three independent biological replicates for each genotype in LL or HL. Error bars are reported as standard deviation (N=3).

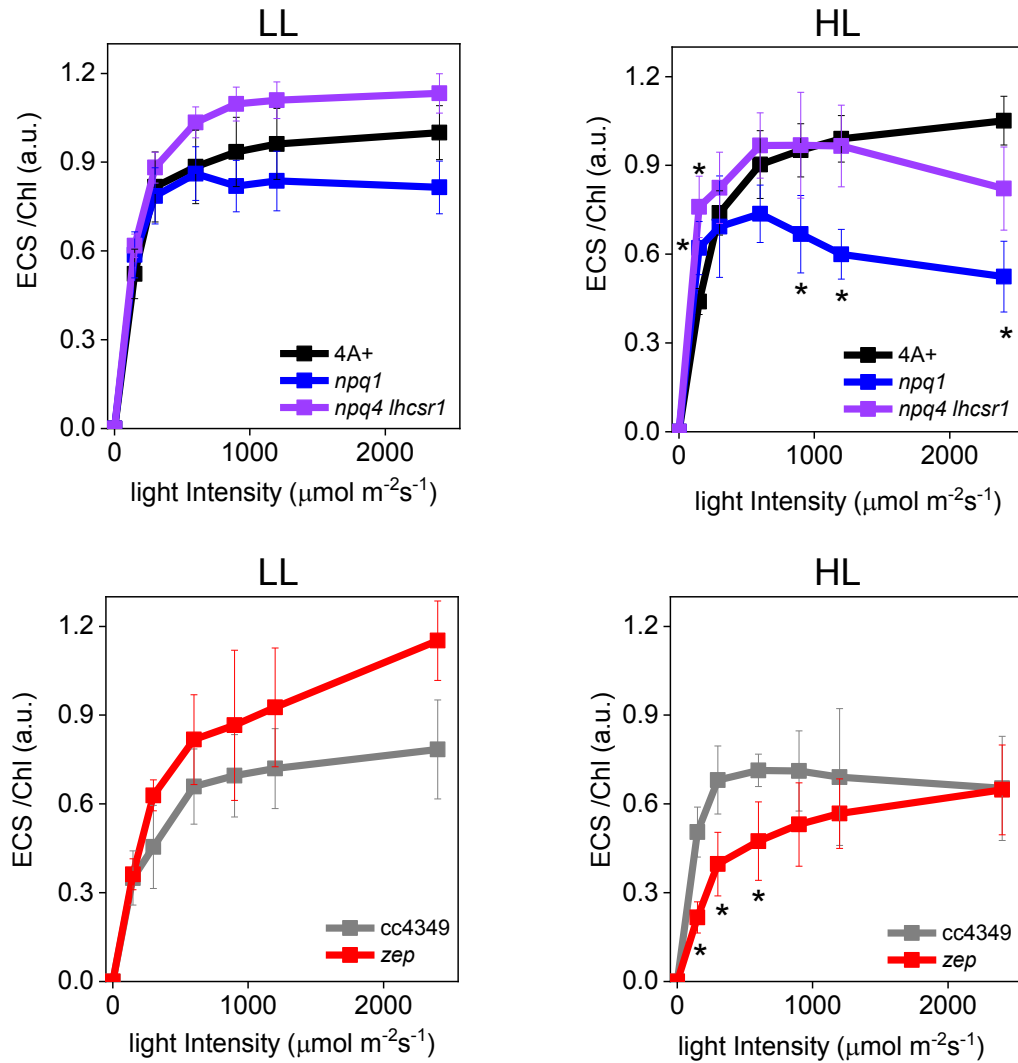

**Figure 1—figure supplement 4.** Electrochromic shift measurements at different light intensities in low light and high light acclimated *Chlamydomonas reinhardtii* cells. Electrochromic shift (ECS) measurements were performed in WT (4A+ and cc4349) and mutant strains (*npq4 lhcsr1*, *npq1* and *zep*) acclimated to low (Panel A and B) or high (Panel C, D) light. Genotypes having the same background are shown in the same Panel. The results reported are representative of three independent biological replicates for each genotype in LL or HL. Error bars are reported as standard deviation. The statistical significance of differences compared to WT (4A+ for *npq1* and *npq1 lhcsr1* mutants, CC4349 for *zep* mutant) is indicated as \* ( $p < 0.05$ ), as determined by unpaired two sample t-test (N=3).

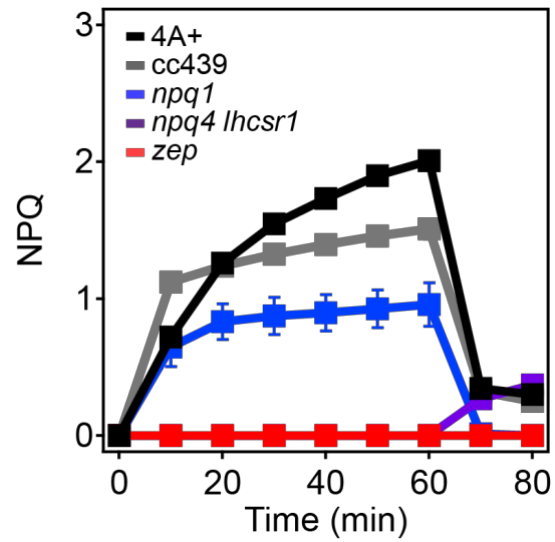

**Figure 1—figure supplement 5.** NPQ induction in low light acclimated *Chlamydomonas reinhardtii* cells. NPQ induction kinetics measured upon 60 minutes of high light ( $2000 \mu\text{mol m}^{-2}\text{s}^{-1}$ ) followed by 20 minutes of dark recovery. The results reported are representative of three independent biological replicates for each genotype in LL or HL. Error bars are reported as standard deviation ( $n=3$ ).



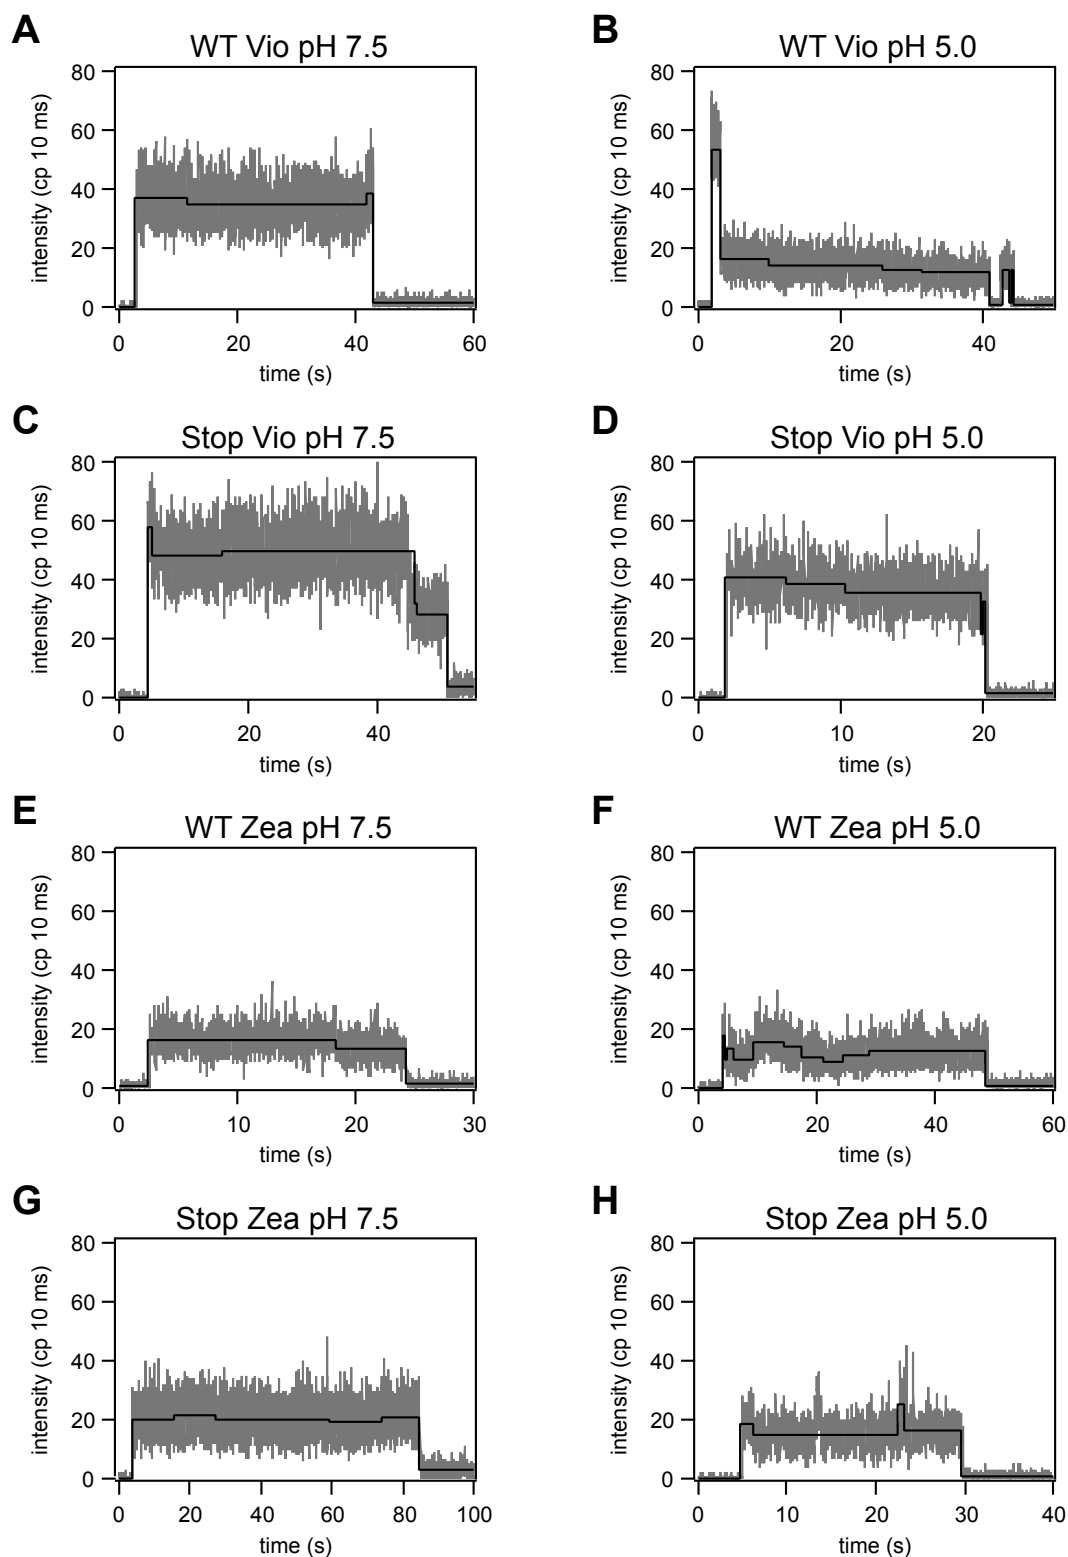

**Figure 1—figure supplement 6. Representative fluorescence intensity traces.** Fluorescence intensity traces for LHCSR3 complexes at pH 7.5 and 5.0. The intensity levels determined by the change-point-finding algorithm are shown in black.

|                       |                                                                  |   |     |
|-----------------------|------------------------------------------------------------------|---|-----|
|                       |                                                                  | ▼ |     |
| C. reinhardtii LHCSR3 | KELNNGRLAMIAIAAFVAQELVEQTEIFEHLALRFKEAILELDDIERDLGLPVTPLPDLNLSL  |   | 259 |
| C. reinhardtii LHCSR1 | KELNNGRLAMIAIAAFVAQELVEQTEIFEHLVLRFEKEVILELEDVERDLGLPLTLPDLNLSL  |   | 253 |
| Chlamydomonas sp ICE  | KELNNGRLAMIAIAGFTVQELVDGQEIFEHLFVGADEVVKELEDDIERDLGISETPVPFPGF-- |   | 257 |
| C. variabilis         | KELNNGRLAMIGVAGFVLQELAVKRGIFEHLALYLEREAILEIEDLDPALNIALPTIP-----  |   | 169 |
| V. carteri            | KELNNGRLAMIAIAAFVAQELVEQTEIFEHLFLRFKEAILELDDIERDVGLPVTPLPSNLNL   |   | 254 |
| B. natans             | KELNNGRLAMLALAGFVAQELVNGKPILG-----                               |   | 185 |
| B. prasinos           | KELSHGRLAMVATAFFVAKELVTGNKIFPQFDLYPYQ-----                       |   | 251 |
| C. cryptica           | KELQNGRLAMLAAGFQAQELVDGKGIIEHFSS-----                            |   | 199 |
| P. Tricornutum        | KELQNGRLAMLAAGFMAQELVDGKGIIEHLL-----                             |   | 210 |
| D. baltica            | KELQNGRLAMLAAGFQAQELVDGKGIIEHLQA-----                            |   | 209 |
| U. linza              | KELNNGRLAMIAVAGFVAQELVNGKGIIEENLKASS-----                        |   | 231 |
| U. prolifera          | KELNNGRLAMIAVAGFVAQELVNGKGIIEENLKASS-----                        |   | 230 |
| P. Patens             | KELNNGRLAMIAIAAFVAQELVSGEIEIFVHLFKRLGL-----                      |   | 244 |
| A. ubliquus           | KELNNGRLAMIAIAAFTVEELVSHQEIEHPGAAL-----                          |   | 227 |
|                       | ***.:*****:. * * :* . *:                                         |   |     |

**Figure 1—figure supplement 7.** Alignment of LHCSR-like proteins: protonatable residues are red written while insertion site for TAA mutation to generate STOP mutant is indicated by black arrow. Protein number for LHCSR-like proteins used for alignment are listed below: XP\_001696064.1 *Chlamydomonas reinhardtii* LHCSR3, XP\_001696125.1 *Chlamydomonas reinhardtii* LHCSR1, XP\_002948670.1 *Volvox carteri* f. *nagariensis*, ADP89594.1 *Chlamydomonas* sp. ICE-L LHCSR2, XP\_001768071.1 *Physcomitrella patens* LHCSR2, ABD58893.1 *Acutodesmus obliquus*, ADY38581.1 *Ulva linza*, ADU04518.1 *Ulva prolifera*, XP\_005848576.1 *Chlorella variabilis*, XP\_002178699.1 *Phaeodactylum tricornutum*, AHH80644.1 *Durinskia baltica*, AA05890.1 *Bigelowiella natans*, CCO66741.1 *Bathycoccus prasinos*.

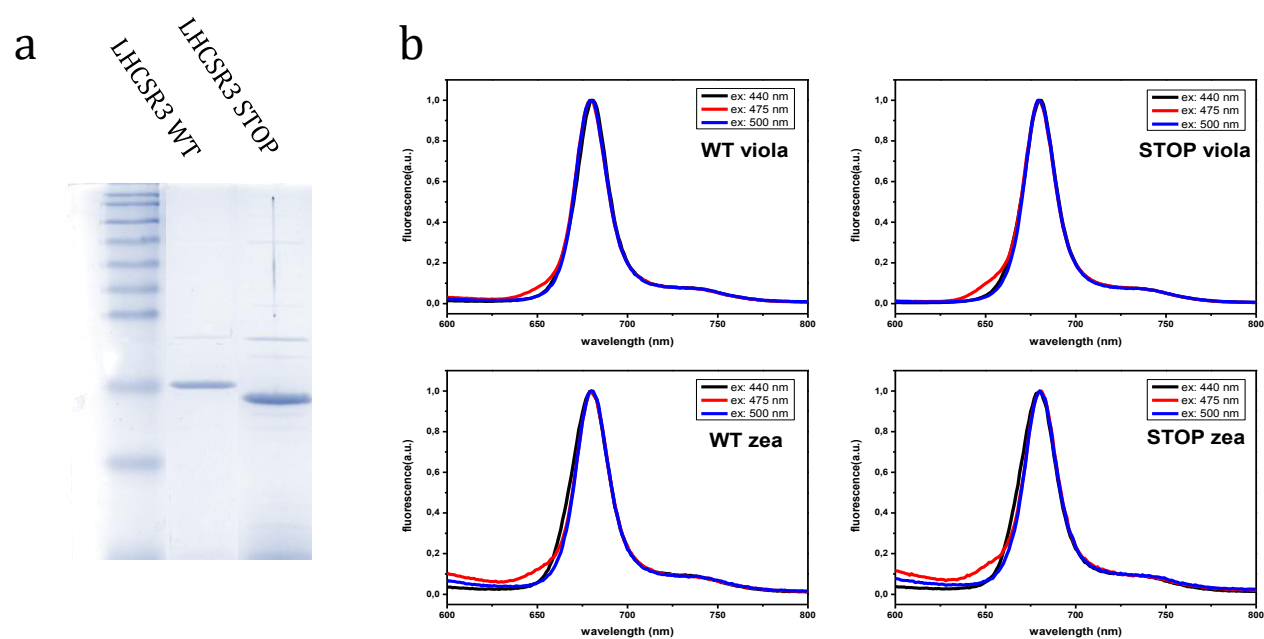

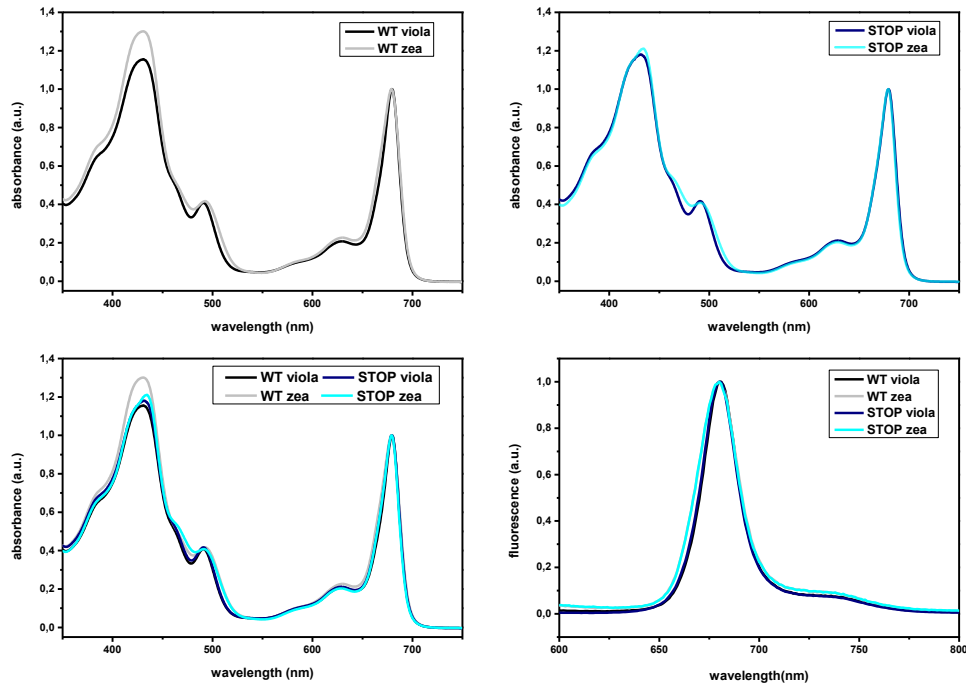

**Figure 1—figure supplement 9.** Absorption and fluorescence emission spectra of LHCSR3 WT and STOP. (a-c) Absorption spectra of WT (a) or STOP (b) refolded with violaxanthin or zeaxanthin. (d) Fluorescence emission spectra of LHCSR3 WT and STOP mutant upon excitation at 440 nm with both violaxanthin and zeaxanthin pigments composition. The results reported are representative of two independent experiments.

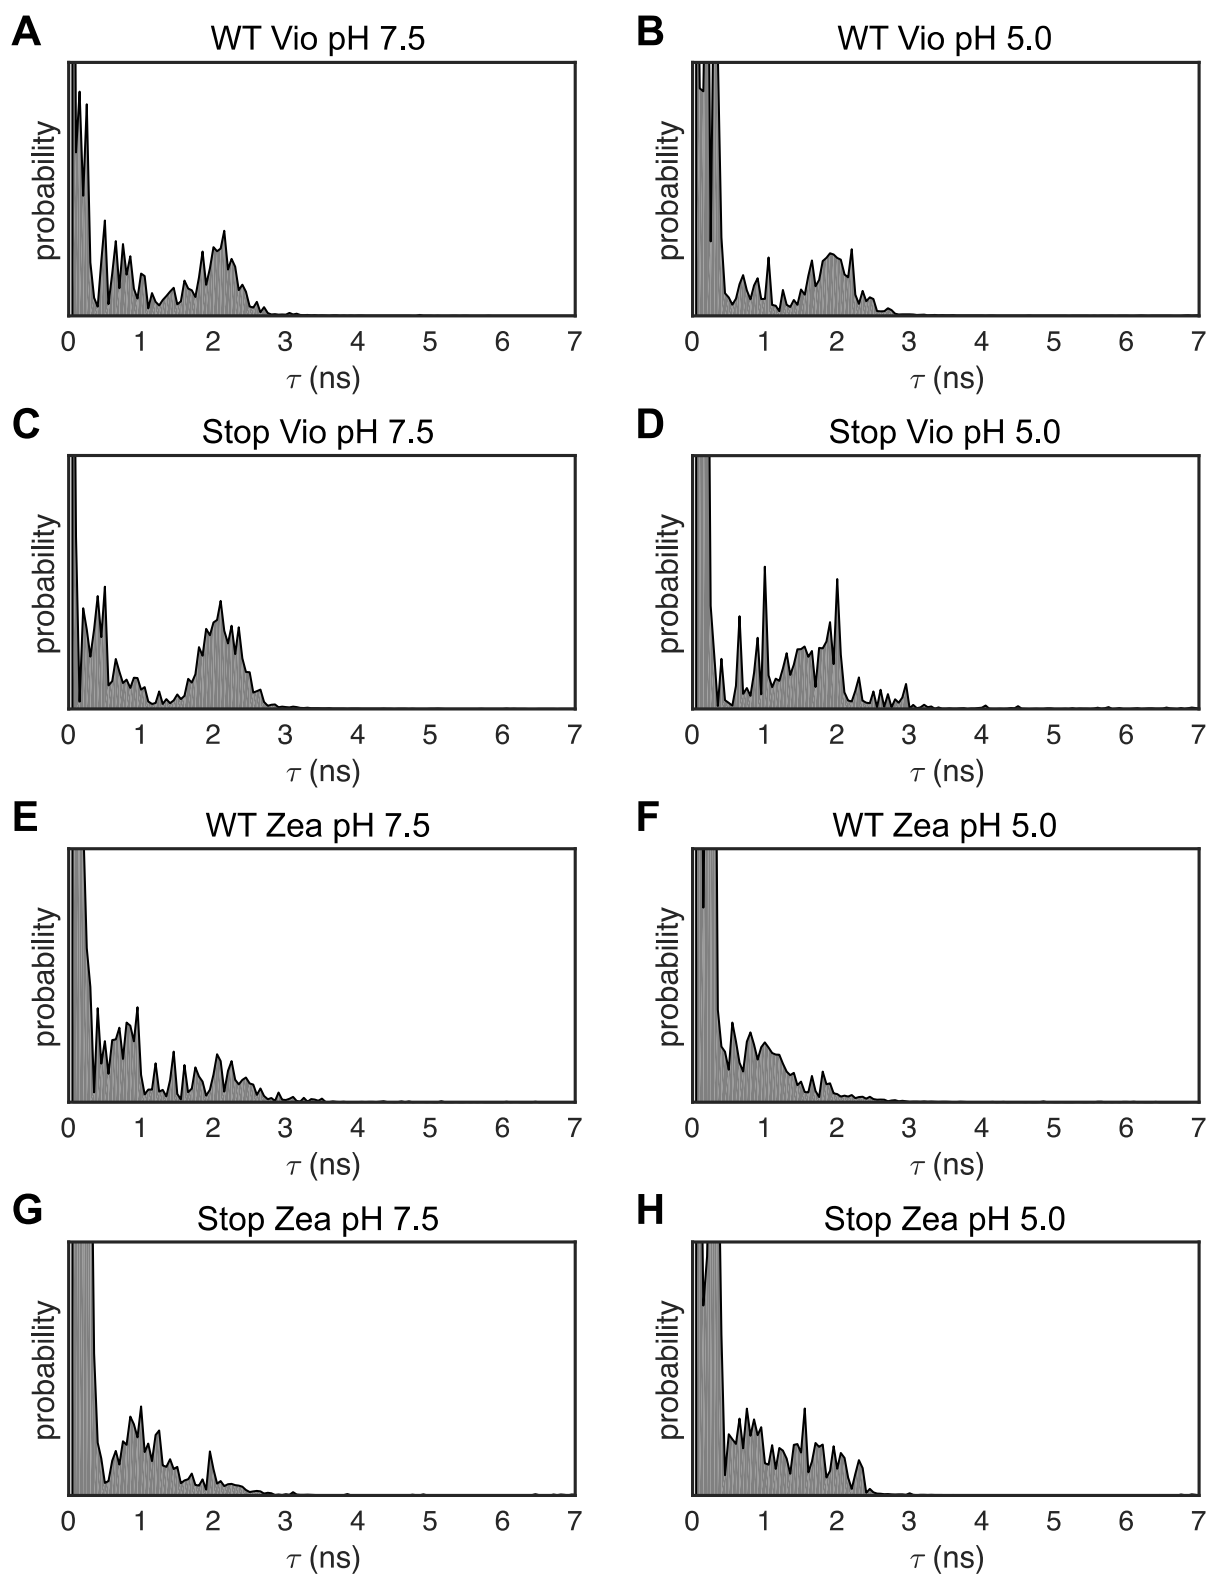

**Figure 2—figure supplement 1 1D Lifetime distributions.** Lifetime distributions for LHCSR3 determined using a one-dimensional inverse Laplace transform (1D-ILT) of the 1D fluorescence lifetime decay. Lifetime states identified from the 1D distribution were used as initial parameters in the fit to the 2D distributions.

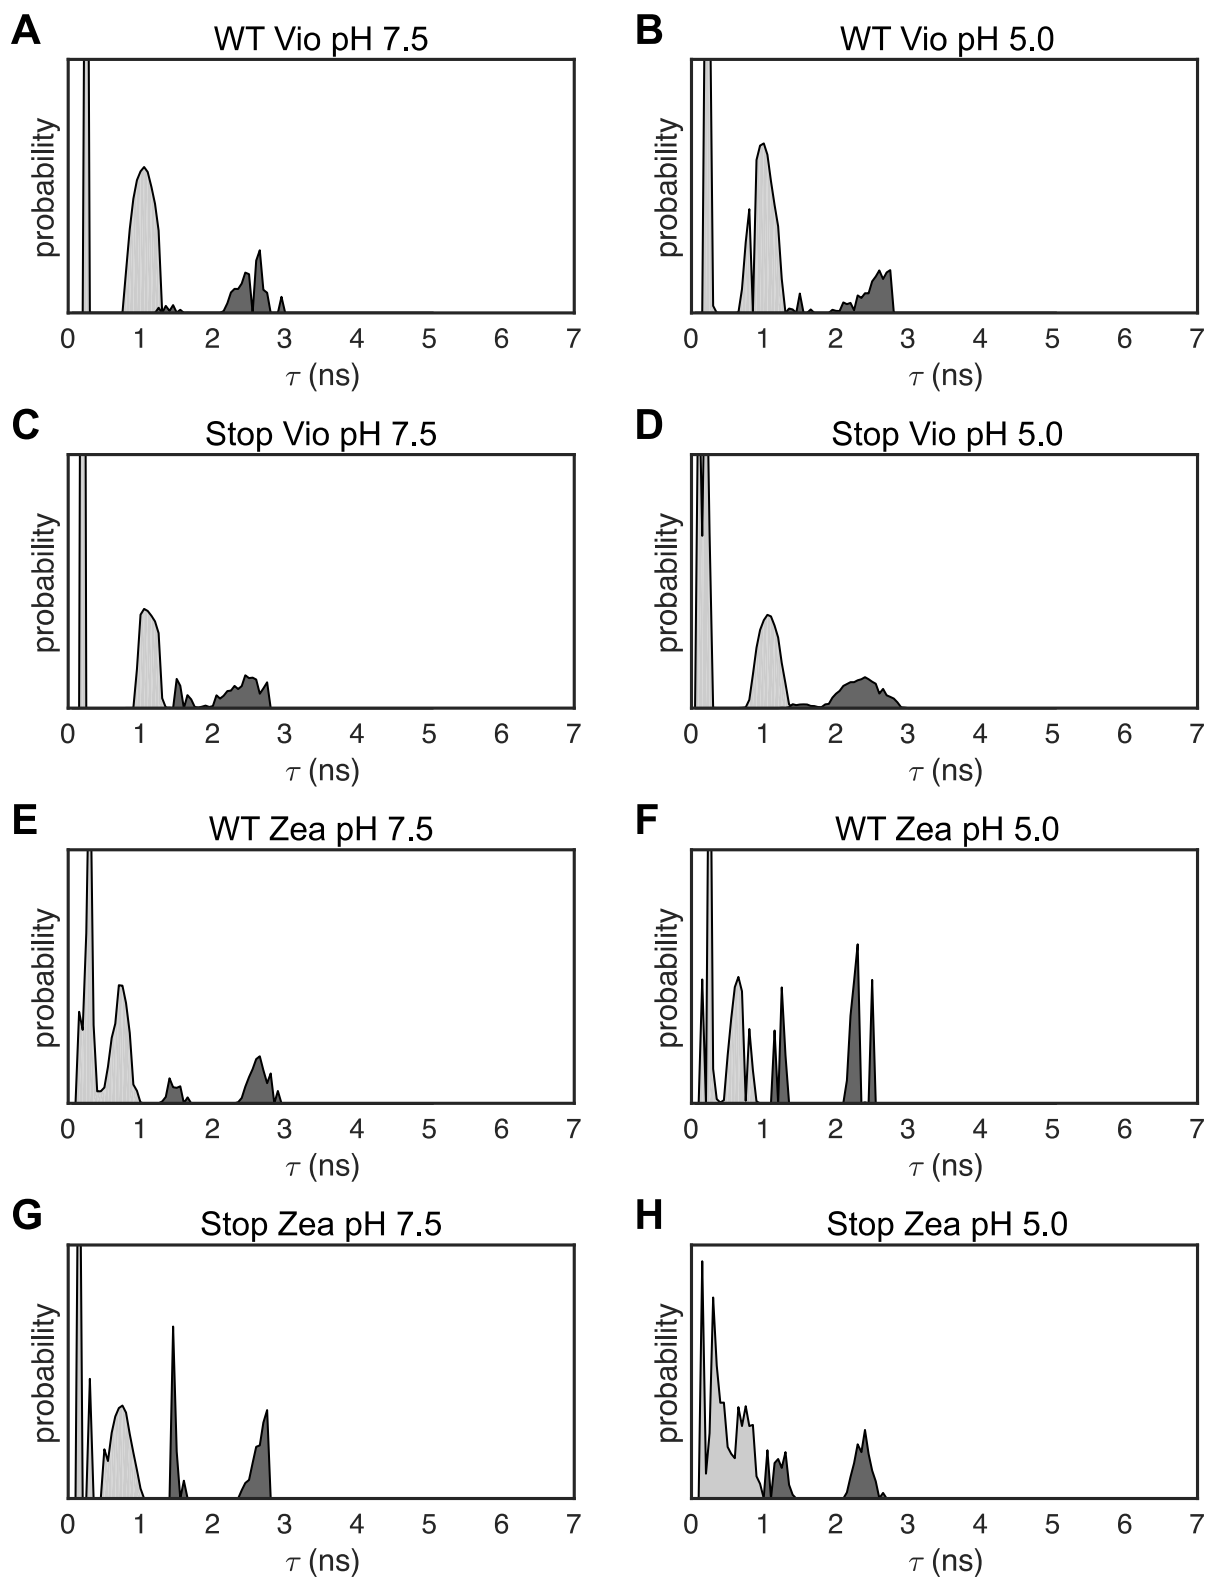

**Figure 2—figure supplement 2. 2D Lifetime distributions.** Lifetime distributions for LHCSR3 complexes at pH 7.5 and 5.0 determined using the maximum entropy method (MEM) to perform a 2D-ILT.

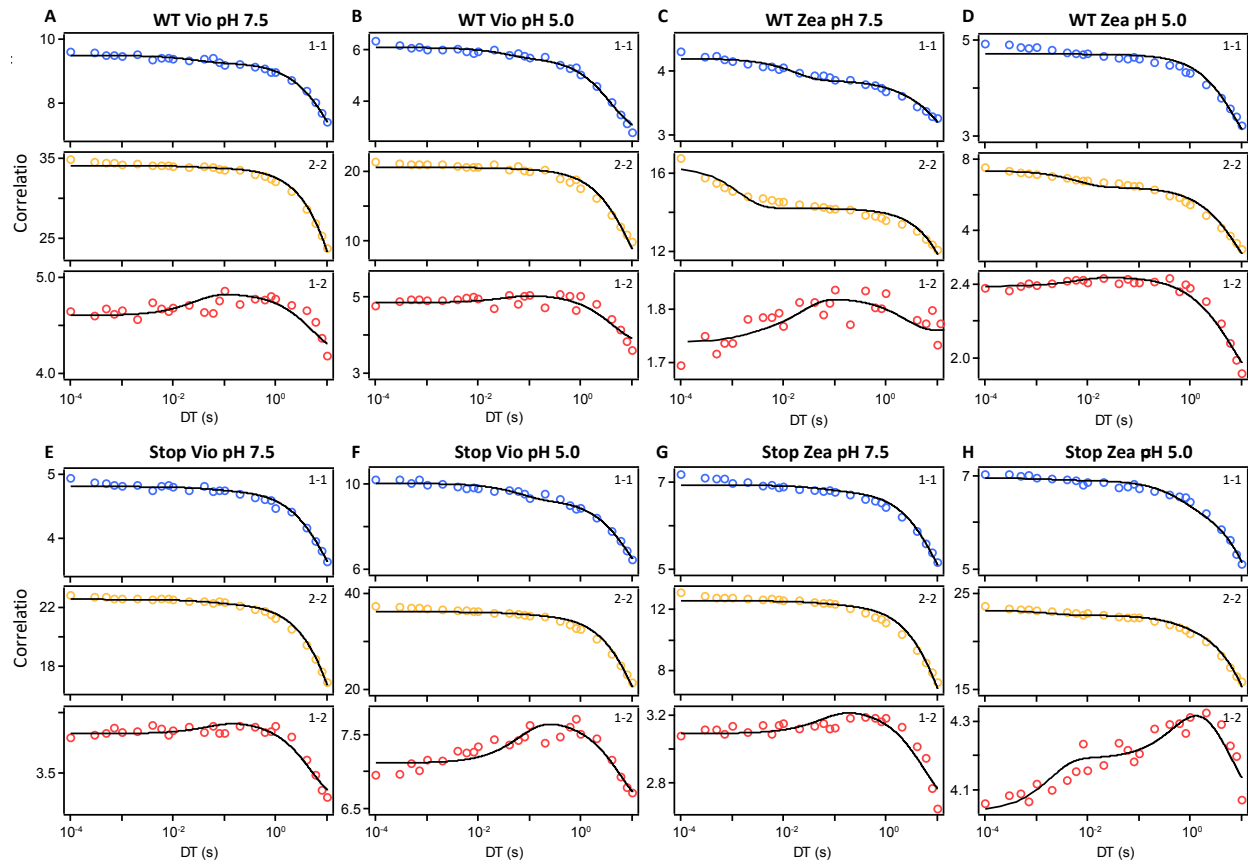

**Figure 2—figure supplement 3. Correlation analysis of LHCSR3 complexes.** Correlation function estimated from the 2D-FLC analysis of single LHCSR3 complexes with Vio at pH 7.5 (A) and pH 5.0 (B), Zea at pH 7.5 (C) and 5.0 (D), stop mutants with Vio at pH 7.5 (E) and pH 5.0 (F) and stop mutants with Zea at pH 7.5 (G) and pH 5.0 (H). The correlation curves for auto (1-1 and 2-2) and cross correlations (1-2) are shown in blue, yellow and red, respectively. The black line shows the fitting curve calculated using the model function given by equation described in the Methods.

| WT Vio                            |      |      |        |           |        |        |   |
|-----------------------------------|------|------|--------|-----------|--------|--------|---|
| pH 7.5                            |      |      | pH 5.0 |           |        |        |   |
| Component                         | 1    | 2    | 3      | Component | 1      | 2      | 3 |
| Fluorescence                      |      |      |        |           |        |        |   |
| Lifetime state                    | 1    | 2    | 1      | 2         | 1      | 2      |   |
| Lifetime                          | 0.71 | 2.45 | 0.71   | 2.45      | 0.71   | 2.45   |   |
| Intensity                         | 0.10 | 0.10 | 0.080  | 0.32      | 0.18   | 0.13   |   |
| Transition rates                  |      |      |        |           |        |        |   |
| Lifetime state<br>Final \ Initial | 1    | 2    | 1      | 2         | 1      | 2      |   |
| 1                                 | 0.25 | 23   | 0.14   | 850       | 0.045  | 0.0017 |   |
| 2                                 | 15   | 0.25 | 230    | 0.23      | <0.001 | 0.039  |   |
| Population                        | 0.61 | 0.39 | 0.79   | 0.21      | 0.94   | 0.060  |   |
| Free energy difference            | 90.0 |      | 278    |           | 587    |        |   |

  

| Stop Vio                          |       |      |        |           |        |        |   |
|-----------------------------------|-------|------|--------|-----------|--------|--------|---|
| pH 7.5                            |       |      | pH 5.0 |           |        |        |   |
| Component                         | 1     | 2    | 3      | Component | 1      | 2      | 3 |
| Fluorescence                      |       |      |        |           |        |        |   |
| Lifetime state                    | 1     | 2    | 1      | 2         | 1      | 2      |   |
| Lifetime                          | 0.49  | 2.27 | 0.49   | 2.27      | 0.49   | 2.27   |   |
| Intensity                         | 0.052 | 0.11 | 0.098  | 0.47      | 0.14   | 0.085  |   |
| Transition rates                  |       |      |        |           |        |        |   |
| Lifetime state<br>Final \ Initial | 1     | 2    | 1      | 2         | 1      | 2      |   |
| 1                                 | 0.28  | 6.0  | 0.17   | 1500      | 0.047  | 0.0014 |   |
| 2                                 | 13    | 0.26 | 320    | 0.25      | <0.001 | 0.027  |   |
| Population                        | 0.32  | 0.68 | 0.82   | 0.18      | 0.96   | 0.040  |   |
| Free energy difference            | -156  |      | 315    |           | 695    |        |   |

  

| WT Zea                            |      |       |        |           |        |        |   |
|-----------------------------------|------|-------|--------|-----------|--------|--------|---|
| pH 7.5                            |      |       | pH 5.0 |           |        |        |   |
| Component                         | 1    | 2     | 3      | Component | 1      | 2      | 3 |
| Fluorescence                      |      |       |        |           |        |        |   |
| Lifetime state                    | 1    | 2     | 1      | 2         | 1      | 2      |   |
| Lifetime                          | 0.47 | 2.35  | 0.47   | 2.35      | 0.47   | 2.35   |   |
| Intensity                         | 0.11 | 0.022 | 0.0076 | 1.0       | 0.091  | 0.23   |   |
| Transition rates                  |      |       |        |           |        |        |   |
| Lifetime state<br>Final \ Initial | 1    | 2     | 1      | 2         | 1      | 2      |   |
| 1                                 | 0.56 | 18    | 0.038  | 730       | 0.021  | <0.001 |   |
| 2                                 | 41   | 0.56  | 12     | 0.038     | <0.001 | 0.021  |   |
| Population                        | 0.31 | 0.69  | 0.98   | 0.020     | 0.42   | 0.58   |   |
| Free energy difference            | -166 |       | 857    |           | -66    |        |   |

  

| Stop Zea                          |       |       |        |           |        |        |   |
|-----------------------------------|-------|-------|--------|-----------|--------|--------|---|
| pH 7.5                            |       |       | pH 5.0 |           |        |        |   |
| Component                         | 1     | 2     | 3      | Component | 1      | 2      | 3 |
| Fluorescence                      |       |       |        |           |        |        |   |
| Lifetime state                    | 1     | 2     | 1      | 2         | 1      | 2      |   |
| Lifetime                          | 0.46  | 2.17  | 0.46   | 2.17      | 0.46   | 2.17   |   |
| Intensity                         | 0.051 | 0.066 | 0.078  | 0.28      | 0.11   | 0.037  |   |
| Transition rates                  |       |       |        |           |        |        |   |
| Lifetime state<br>Final \ Initial | 1     | 2     | 1      | 2         | 1      | 2      |   |
| 1                                 | 0.29  | 6.7   | 0.15   | 1900      | 0.068  | 0.0017 |   |
| 2                                 | 9.9   | 0.29  | 270    | 0.15      | <0.001 | 0.066  |   |
| Population                        | 0.40  | 0.60  | 0.87   | 0.13      | 0.97   | 0.030  |   |
| Free energy difference            | -82   |       | 400    |           | 768    |        |   |

**Figure 2—table supplement 1. Summary of dynamic properties estimated by the correlation fitting analysis.** The fluorescence intensity and population of the initial and final state and the transition rates between these states for each component (blue, red, gray) were determined by global fitting of the correlation functions shown in Figure S18. The free-energy differences were given by the equation described in the Methods. The fluorescence intensity is a relative intensity that is normalized by the total measurement time for each sample and by a scaling factor to set the maximum intensity to be 1.



|            | Total Chlorophylls | Chlorophyll a | Chlorophyll b | Chla/Chlb    | Neoxanthin  | Violaxanthin | Anteraxanthin | Lutein      | Zeaxanthin  | Total Carotenoids | Chl/Car     |
|------------|--------------------|---------------|---------------|--------------|-------------|--------------|---------------|-------------|-------------|-------------------|-------------|
| WT VIOLA   | 7                  | 6,59 ± 0,00   | 0,41 ± 0,00   | 16,16 ± 0,16 | 0,00 ± 0,00 | 0,98 ± 0,00  | 0,09 ± 0,03   | 1,02 ± 0,02 | 0,08 ± 0,01 | 2,17 ± 0,02       | 3,22 ± 0,02 |
| STOP VIOLA | 7                  | 6,38 ± 0,01   | 0,62 ± 0,01   | 10,33 ± 0,12 | 0,00 ± 0,00 | 0,99 ± 0,07  | 0,07 ± 0,02   | 0,95 ± 0,08 | 0,03 ± 0,04 | 2,04 ± 0,05       | 3,43 ± 0,08 |
| WT ZEA     | 7                  | 6,82 ± 0,01   | 0,18 ± 0,01   | 37,58 ± 2,82 | 0,00 ± 0,00 | 0,27 ± 0,00  | 0,00 ± 0,00   | 0,31 ± 0,04 | 1,41 ± 0,02 | 1,99 ± 0,03       | 3,51 ± 0,05 |
| STOP ZEA   | 7                  | 6,81 ± 0,00   | 0,19 ± 0,00   | 36,56 ± 0,35 | 0,00 ± 0,00 | 0,22 ± 0,00  | 0,00 ± 0,00   | 0,44 ± 0,47 | 1,09 ± 0,02 | 1,75 ± 0,00       | 3,99 ± 0,00 |

**Figure 2—table supplement 2.** Pigment binding properties of recombinant LHCSR3 WT and STOP refolded in vitro. Binding pigments are reported referred to 7 Chlorophyll. The results reported are representative of two independent experiments. Errors are reported as standard deviation.

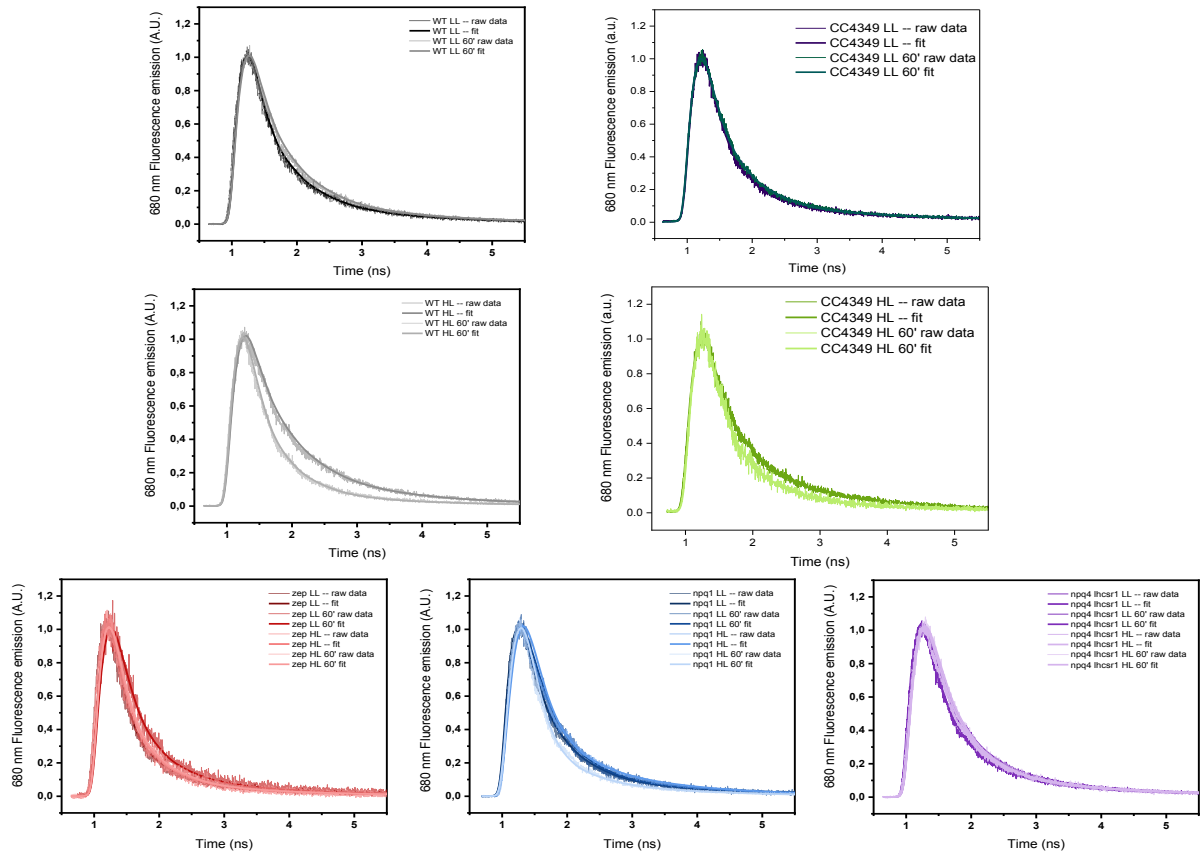

**Figure 3—figure supplement 1.** 77K raw and fitted traces acquired by TCSPC of *Chlamydomonas reinhardtii* WT (4a+) and mutant strains. The results reported are representative of two independent experiments with two independent biologic replicates.

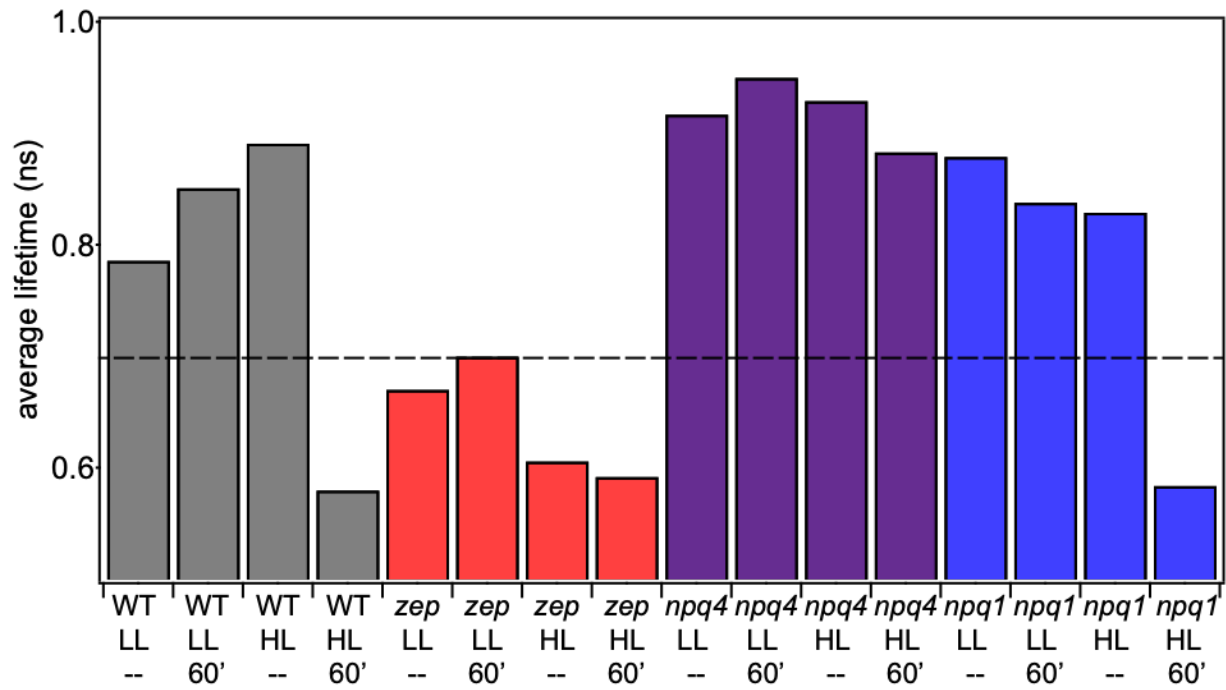

**Figure 3—figure supplement 2.** Average fluorescence lifetime for WT (4A+) and mutant strains under all light conditions. The other WT strain (cc4349) has similar values. Above dotted line is considered unquenched and below dotted line is considered quenched. The results reported are representative of two independent experiments with two independent biologic replicates.

|                    | t1   | f1   | t2   | f2   | t3   | f3   | avg<br>lifetime | t1   | f1   | t2   | f2   | t3   | f3   | avg<br>lifetime | mean<br>avg<br>lifetime | dev.st. |
|--------------------|------|------|------|------|------|------|-----------------|------|------|------|------|------|------|-----------------|-------------------------|---------|
| 4A+ LL --          | 0.04 | 0.27 | 0.45 | 0.40 | 1.77 | 0.34 | 0.78            | 0.04 | 0.28 | 0.38 | 0.40 | 1.79 | 0.33 | 0.75            | 0.77                    | 0.03    |
| 4A+LL 60'          | 0.04 | 0.21 | 0.47 | 0.43 | 1.78 | 0.36 | 0.85            | 0.04 | 0.21 | 0.43 | 0.48 | 1.60 | 0.32 | 0.72            | 0.79                    | 0.10    |
| 4A+HL --           | 0.04 | 0.16 | 0.48 | 0.41 | 1.61 | 0.43 | 0.89            | 0.04 | 0.16 | 0.52 | 0.53 | 1.88 | 0.31 | 0.87            | 0.88                    | 0.01    |
| 4A+HL 60'          | 0.04 | 0.29 | 0.37 | 0.46 | 1.57 | 0.25 | 0.58            | 0.04 | 0.33 | 0.40 | 0.41 | 1.64 | 0.26 | 0.61            | 0.59                    | 0.02    |
| npq4 lhcsr1 LL --  | 0.04 | 0.19 | 0.54 | 0.41 | 2.00 | 0.41 | 1.04            | 0.04 | 0.17 | 0.56 | 0.39 | 2.00 | 0.44 | 1.10            | 1.07                    | 0.04    |
| npq4 lhcsr1 LL 60' | 0.04 | 0.19 | 0.47 | 0.46 | 2.06 | 0.35 | 0.95            | 0.04 | 0.19 | 0.44 | 0.45 | 2.03 | 0.36 | 0.94            | 0.94                    | 0.01    |
| npq4 lhcsr1 HL --  | 0.04 | 0.18 | 0.42 | 0.46 | 2.02 | 0.36 | 0.93            | 0.04 | 0.19 | 0.42 | 0.47 | 2.09 | 0.34 | 0.91            | 0.92                    | 0.01    |
| npq4 lhcsr1 HL 60' | 0.04 | 0.15 | 0.40 | 0.49 | 1.90 | 0.36 | 0.88            | 0.04 | 0.20 | 0.41 | 0.46 | 1.94 | 0.34 | 0.86            | 0.87                    | 0.01    |
| npq1 LL --         | 0.04 | 0.22 | 0.43 | 0.46 | 2.12 | 0.32 | 0.88            | 0.04 | 0.31 | 0.42 | 0.42 | 2.33 | 0.27 | 0.81            | 0.85                    | 0.05    |
| npq1 LL 60'        | 0.04 | 0.15 | 0.40 | 0.52 | 1.89 | 0.33 | 0.84            | 0.04 | 0.28 | 0.46 | 0.44 | 2.34 | 0.29 | 0.88            | 0.86                    | 0.03    |
| npq1 HL --         | 0.04 | 0.25 | 0.53 | 0.44 | 1.92 | 0.32 | 0.85            | 0.04 | 0.24 | 0.52 | 0.44 | 2.37 | 0.32 | 0.99            | 0.92                    | 0.10    |
| npq1 HL 60'        | 0.04 | 0.35 | 0.34 | 0.35 | 1.46 | 0.30 | 0.57            | 0.04 | 0.32 | 0.46 | 0.42 | 1.75 | 0.26 | 0.66            | 0.61                    | 0.07    |
| cc4349 LL --       | 0.04 | 0.27 | 0.39 | 0.43 | 2.24 | 0.30 | 0.86            | 0.04 | 0.33 | 0.44 | 0.39 | 2.10 | 0.29 | 0.79            | 0.82                    | 0.05    |
| cc4349 LL 60'      | 0.04 | 0.24 | 0.42 | 0.45 | 2.37 | 0.31 | 0.94            | 0.04 | 0.26 | 0.41 | 0.45 | 1.87 | 0.29 | 0.75            | 0.84                    | 0.14    |
| cc4349 HL --       | 0.04 | 0.19 | 0.42 | 0.38 | 1.70 | 0.42 | 0.89            | 0.04 | 0.21 | 0.40 | 0.41 | 1.66 | 0.38 | 0.81            | 0.85                    | 0.06    |
| cc4349 HL 60'      | 0.04 | 0.26 | 0.34 | 0.42 | 1.37 | 0.31 | 0.59            | 0.04 | 0.25 | 0.35 | 0.48 | 1.76 | 0.27 | 0.66            | 0.62                    | 0.05    |
| zep LL --          | 0.04 | 0.41 | 0.40 | 0.32 | 1.93 | 0.27 | 0.67            | 0.04 | 0.46 | 0.34 | 0.33 | 1.72 | 0.21 | 0.49            | 0.58                    | 0.12    |
| zep LL 60'         | 0.04 | 0.21 | 0.33 | 0.45 | 1.58 | 0.34 | 0.70            | 0.04 | 0.38 | 0.39 | 0.37 | 1.82 | 0.25 | 0.61            | 0.66                    | 0.06    |
| zep HL --          | 0.04 | 0.36 | 0.38 | 0.39 | 1.79 | 0.25 | 0.61            | 0.04 | 0.32 | 0.27 | 0.39 | 1.23 | 0.30 | 0.48            | 0.54                    | 0.09    |
| zep HL 60'         | 0.04 | 0.34 | 0.36 | 0.39 | 1.59 | 0.27 | 0.59            | 0.04 | 0.38 | 0.31 | 0.37 | 1.49 | 0.24 | 0.49            | 0.54                    | 0.07    |

**Figure 3—table supplement 1.** 77K time resolved fluorescence analysis and average fluorescence decay lifetimes of whole cells. Kinetics were fitted with a three-exponential decay function using Vinci 2 software from ISS. Fractions (fi) and time constants (ti) are reported. Average fluorescence lifetimes were calculated as  $\sum fi \tau_i$ . The results reported are representative of two independent experiments with two independent biologic replicates.

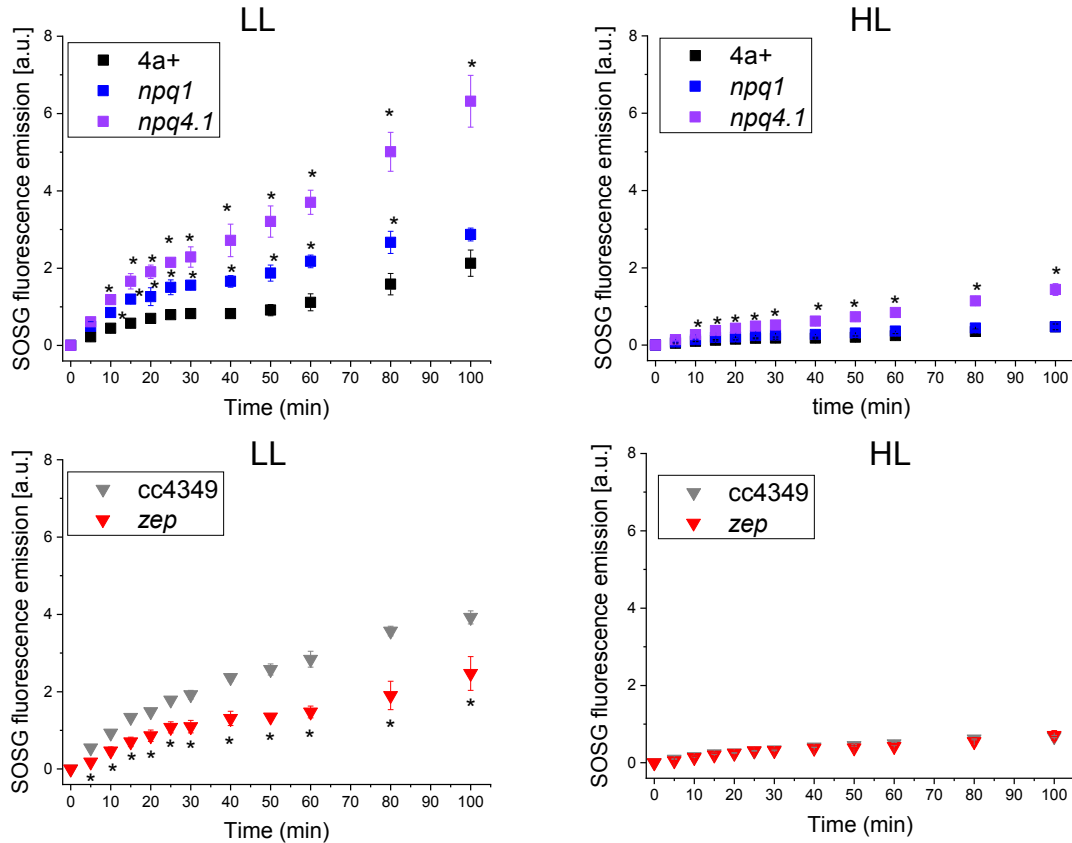

**Figure 3—figure supplement 3.** Kinetics of singlet oxygen production in WT and mutant strains. Singlet oxygen production rate was measured by the singlet oxygen sensor green (SOSG) fluorescence probe. Low light (LL) or high light (HL) acclimated samples were exposed to strong red light ( $2000 \mu\text{mol m}^{-2}\text{s}^{-1}$ ) and singlet oxygen production rate was probed at the different time points by following SOSG fluorescence at 530 nm. Genotypes having the same background are shown in the same Panel. The results reported are representative of three independent biological replicates for each genotype in LL or HL. Error bars are reported as standard deviation (n=3). The statistical significance of differences compared to WT (4A+ for *npq1* and *npq1 lhcsr1* mutants, CC4349 for *zep* mutant) is indicated as \* ( $p < 0.05$ ), as determined by unpaired two sample t-test (N=3).

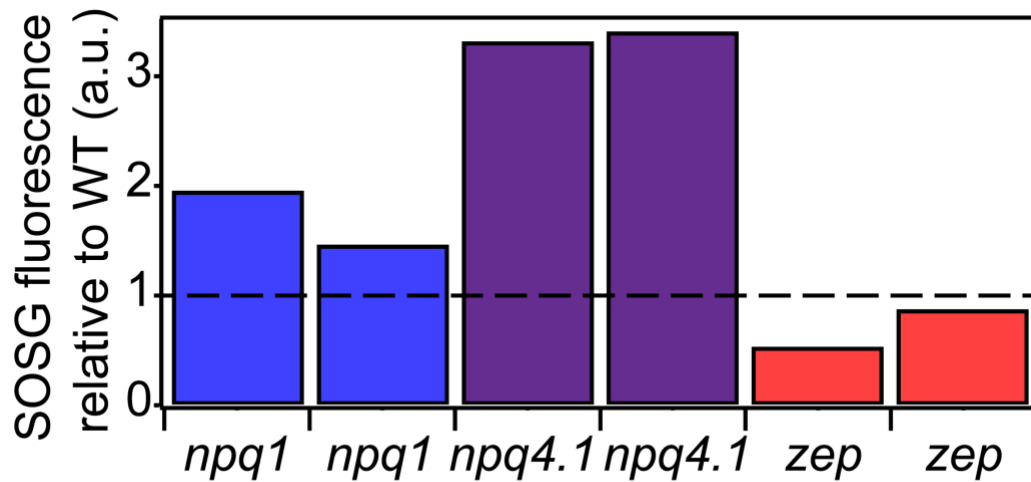

**Figure 3—figure supplement 4.** Singlet oxygen production in WT and mutant strains. Singlet oxygen production rate was measured by the singlet oxygen sensor green (SOSG) fluorescence probe. Low light (LL), left, or high light (HL), right, acclimated samples were exposed to strong red light ( $2000 \mu\text{mol m}^{-2}\text{s}^{-1}$ ), right. Singlet oxygen production rates relative to WT (4A+ for *npq1* and *npq4 lhcsr1*, cc4349 for *zep*). The results reported are representative of three independent biological replicates for each genotype in LL or HL. Unnormalized data are reported in figure supplement 3.
